# Supplementary material for: Magnitude and determinants of road traffic accidents in Northern Ethiopia: a cross-sectional study
Source: PubMed Central journal article supplement — BMJ Open. 2020 Feb 27;10(2):e034133. doi: 10.1136/bmjopen-2019-034133 (PMC7050301; doi:10.1136/bmjopen-2019-034133), 2020-02-27
Supplement: bmjopen-2019-034133.draft_revisions.pdf [file bmjopen-2019-034133.draft_revisions.pdf]

# BMJ Open

BMJ Open is committed to open peer review. As part of this commitment we make the peer review history of every article we publish publicly available.

When an article is published we post the peer reviewers' comments and the authors' responses online. We also post the versions of the paper that were used during peer review. These are the versions that the peer review comments apply to.

The versions of the paper that follow are the versions that were submitted during the peer review process. They are not the versions of record or the final published versions. They should not be cited or distributed as the published version of this manuscript.

BMJ Open is an open access journal and the full, final, typeset and author-corrected version of record of the manuscript is available on our site with no access controls, subscription charges or pay-per-view fees (<http://bmjopen.bmj.com>).

If you have any questions on BMJ Open's open peer review process please email [info.bmjopen@bmj.com](mailto:info.bmjopen@bmj.com)

# BMJ Open

## Magnitude and determinants of road traffic accident in Mekelle city, Tigray, Northern Ethiopia: A cross sectional study

|                               |                                                                                                                                                                                                  |
|-------------------------------|--------------------------------------------------------------------------------------------------------------------------------------------------------------------------------------------------|
| Journal:                      | <i>BMJ Open</i>                                                                                                                                                                                  |
| Manuscript ID                 | bmjopen-2019-034133                                                                                                                                                                              |
| Article Type:                 | Original research                                                                                                                                                                                |
| Date Submitted by the Author: | 11-Oct-2019                                                                                                                                                                                      |
| Complete List of Authors:     | Woldu, Awtachew; Mekelle University College of Health Sciences Desta, Abraham; Tigray Health Research Institute, Public Health Research Woldearegay , Tewolde ; Tigray Health Research Institute |
| Keywords:                     | Road Traffic Accident, Drivers, Mekelle city, Tigray, Ethiopia                                                                                                                                   |
|                               |                                                                                                                                                                                                  |

SCHOLARONE™  
Manuscripts

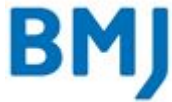

I, the Submitting Author has the right to grant and does grant on behalf of all authors of the Work (as defined in the below author licence), an exclusive licence and/or a non-exclusive licence for contributions from authors who are: i) UK Crown employees; ii) where BMJ has agreed a CC-BY licence shall apply, and/or iii) in accordance with the terms applicable for US Federal Government officers or employees acting as part of their official duties; on a worldwide, perpetual, irrevocable, royalty-free basis to BMJ Publishing Group Ltd ("BMJ") its licensees and where the relevant Journal is co-owned by BMJ to the co-owners of the Journal, to publish the Work in this journal and any other BMJ products and to exploit all rights, as set out in our [licence](#).

The Submitting Author accepts and understands that any supply made under these terms is made by BMJ to the Submitting Author unless you are acting as an employee on behalf of your employer or a postgraduate student of an affiliated institution which is paying any applicable article publishing charge ("APC") for Open Access articles. Where the Submitting Author wishes to make the Work available on an Open Access basis (and intends to pay the relevant APC), the terms of reuse of such Open Access shall be governed by a Creative Commons licence – details of these licences and which [Creative Commons](#) licence will apply to this Work are set out in our licence referred to above.

Other than as permitted in any relevant BMJ Author's Self Archiving Policies, I confirm this Work has not been accepted for publication elsewhere, is not being considered for publication elsewhere and does not duplicate material already published. I confirm all authors consent to publication of this Work and authorise the granting of this licence.

1  
2  
3 **1 Magnitude and determinants of road traffic accident in Mekelle city, Tigray,**  
4  
5  
6 **2 Northern Ethiopia: A cross sectional study**  
7  
8  
9  
10  
11  
12

13 5 Awtachew Berhe Woldu [MSc.]<sup>1</sup>, Abraham Aregay Desta [MSc.]<sup>2\*</sup>, Tewolde Wubayehu  
14  
15 6 Woldearegay [MD, MSc.]<sup>3</sup>  
16  
17  
18  
19  
20  
21

22 9 <sup>1</sup> Department of Biostatistics, School of Public Health, Mekelle University, Mekelle, Tigray  
23  
24 10 Region, Ethiopia, e-mail: [awtachewb@gmail.com](mailto:awtachewb@gmail.com), Cell phone: +251925450934  
25  
26  
27  
28

29 12 <sup>2</sup> Department of Public Health Research, Public Health Research and Emergency Management  
30  
31 13 Directorate, Tigray Health Research Institute, Mekelle, Tigray Region, Ethiopia, e-mail:  
32  
33 14 [abaregaydesta@gmail.com](mailto:abaregaydesta@gmail.com), cell phone: +251923454554, P. O. Box: 1547  
34  
35  
36  
37

38 16 <sup>3</sup> Tigray Health Research Institute, Mekelle, Tigray Region, Ethiopia, e-mail:  
39  
40 17 [tewuba@yahoo.com](mailto:tewuba@yahoo.com), cell phone: +251907363636, P. O. Box: 1547  
41  
42  
43  
44  
45  
46  
47

48 20 \*Corresponding author: Abraham Aregay Desta (AD)  
49  
50  
51  
52  
53  
54  
55  
56  
57  
58  
59  
60

## 24 **Abstract**

25 **Objective:** Road Traffic Accident is becoming a threat to public health in many developing  
26 countries including Ethiopia. Therefore, this study aimed to assess the magnitude and determinants  
27 of road traffic accidents.

28 **Method:** A cross-sectional study was done using a simple random sampling technique and data  
29 were collected from drivers from Feb to Jun 2015 in Mekelle city, Ethiopia. A binary logistic  
30 regression was used to identify factors associated with road traffic accident.

31 **Results:** The magnitude of road traffic accident was found to be 23.17%. According to the drivers'  
32 perceived cause of the accident, 22 (38.60%) of the accident was due to violation of traffic rules  
33 and regulations. The majority of the victims were pedestrians, 19 (33.33%). Drivers who were  
34 driving a governmental vehicle were 4.16 (AOR=4.16; 95% CI: 1.48- 11.70) times more likely to  
35 have road traffic accident compared to those who drive private vehicles. Drivers who consumed  
36 alcohol were 2.29 (AOR=2.29; 95% CI: 1.08-4.85) times more likely to have road traffic accident  
37 compared to those drivers who do not consume alcohol.

38 **Conclusion:** Magnitude of RTA was high. Driving a governmental vehicle and alcohol  
39 consumption were the factors associated with Road Traffic Accident. Monitoring blood alcohol  
40 level of drivers should be in place. Holistic study should be done to identify the causes of RTA.

## 41 **Keywords**

42 Road Traffic Accident; Drivers; Mekelle city; Tigray; Ethiopia

## 43 **Strength and Limitation**

- 44 ➤ Data quality was assured under close supervision of principal investigators.
- 45 ➤ Findings of the study were based only by quantitative study which may loss the quality that  
46 can be addressed by qualitative study.
- 47 ➤ The cross-sectional study design limits the factors to establish temporal relationship;  
48 hence inference of causation is not applicable

## 49 **1. Introduction**

50 Road Traffic Accident (RTA) is an accident that happens unexpectedly, unintentionally and  
51 unpredictably under unexpected conditions. Accordingly, RTAs are collisions between vehicles,  
52 between vehicles and pedestrians, between vehicles and animals, or fixed obstacles [1]. RTA  
53 contributes to poverty by causing loss of productivity, material damages, injuries, disabilities, grief  
54 and deaths [2]. Road traffic injuries are increasing worldwide with unequal number occurring in  
55 developing countries [3]. Road traffic injuries account for 2.1% of all deaths worldwide and ranked  
56 10<sup>th</sup> killer health problem globally. Twenty three percent of all injury related deaths occurred by  
57 traffic accident worldwide, of which 90% occurred in low and middle income countries, where  
58 81% of the world's population live and own about 20% of the world's vehicles. Predictions  
59 indicated that RTA mortality will be 67% by 2020 if appropriate actions are not taken [4].

60 World Health Organization (WHO) in 2011 reported that the RTA in Ethiopia reached 22,786  
61 which accounted 2.77% of all the deaths. The report showed that RTA is the 9<sup>th</sup> killer health  
62 problem in the country. Road traffic accident makes Ethiopia 12<sup>th</sup> and 9<sup>th</sup> in the world and in the  
63 Africa continent respectively [5]. Poor conditions of quality of vehicles and less road safety are  
64 determinant factors for RTA in Africa [6] including Ethiopia [7]. Despite infrastructure and quality

1  
2  
3 65 of vehicles, evidences also noted that human behavior is the most common factor accounting for  
4  
5 66 more than 85% of all traffic accidents [8]. Mekelle is a fast growing regional city, which owes a  
6  
7 67 heavy traffic flow, especially during peak hours [9]. In Mekelle city it was reported that road traffic  
8  
9 68 accidents had increased from year to year and it was shown that 96% of the causes were related to  
10  
11 69 human risk behavior whereas 4% was due to the vehicle problem [10]. Therefore, this study was  
12  
13  
14 70 aimed to assess the magnitude and determinants of road traffic accidents Mekelle city.

## 17 18 71 **2. Methods**

### 19 20 21 72 **Study setting**

22  
23 73 The study was conducted among drivers in Mekelle city, Tigray, northern Ethiopia from Feb to  
24  
25 74 Jun 2015. Mekelle is the capital city of the Tigray regional state which is found at 783 Km north  
26  
27 75 of the capital city of Ethiopia, Addis Ababa. Regarding road infrastructure: Mekelle city has 55  
28  
29 76 km asphalted, 23 km cobble stone and 152 km gravel road [11].

### 30 31 32 33 77 **Study design**

34  
35  
36 78 A cross-sectional study design was used.

### 37 38 39 79 **Participants**

40  
41 80 All drivers who were based in Mekelle city, had a legal driving license and who were driving taxi,  
42  
43 81 Bajaj (three wheel taxi), private owned car and governmental car in Mekelle city were included in  
44  
45 82 the study. Heavy truck drivers, drivers who were not working and sick during the study period,  
46  
47 83 those who drive more than two vehicle types and those who came from other areas to Mekelle city  
48  
49 84 were excluded from the study.  
50  
51  
52  
53  
54  
55  
56  
57  
58  
59  
60

1  
2  
3 85 The sample size was calculated from a previous study, where the prevalence of road traffic accident  
4  
5 86 was reported, p=22% in Mekelle city [10]. Using 5% marginal error and 95% confidence interval  
6  
7  
8 87 by the following formula:

9  
10 88  $n = (Z_{\alpha/2})^2 P (P-1)/D^2$

11  
12 89 Where n = Minimum sample size required

13  
14 90 Z = Standard score corresponding to 95% confidence interval

15  
16 91 P = Assumed proportion of drivers

17  
18 92 D = Margin of error (precision) 5%

19  
20 93  $n = 3.84 \times 0.1716/0.0025 = 263$

21  
22 94 Since the source population for the study was less than 10,000(i.e. 1500) the sample size correction  
23  
24  
25  
26 95 formula was used:

27  
28 96  $nf = n/1 + (n/N)$

29  
30 97 Where nf= desired sample size

31  
32 98 n=calculated sample size

33  
34 99 N=total population

35  
36  
37 100  $nf = n/1 + (n/N) = 263/1 + (263/1500) = 263/1.175 = 223.8 \sim 224$

38  
39  
40 101 By adding 10% contingency for non-response, the sample size was  $224 + 22 = 246$



## 102 **Sampling procedures**

103 A sampling frame was constructed by a vehicle plate number, which was obtained from Mekelle  
104 city transport office. The frame was sub categorized based on the type of the vehicle as a taxi,  
105 Bajaj, governmental vehicles, and private/house vehicles. Sub samples were calculated for each  
106 category of vehicles proportional to the number of vehicles in the respective categories. Then,  
107 study subjects were selected using simple random sampling method (see Figure 1).

## 108 **Data collection procedures and tools**

109 The study subjects (drivers) were traced and interviewed for data collection. The drivers were  
110 traced at their destination for taxi and Bajaj, house cars in their working area and governmental  
111 cars at their offices using the car plate number. A structured interviewer administered  
112 questionnaire, adapted from different literatures, was used. The questionnaire was initially  
113 prepared in English (“See S1 in the Supporting information for the questionnaire”) and was  
114 translated into the local language Tigrigna (“See S2 in the Supporting information for the local  
115 language (Tigrigna)). The instrument included: socio-demographic characteristics of drivers, risk  
116 factors and risky driving factors associated with road traffic accidents for the previous two years.  
117 Trained data collectors and supervisors handled the data collection process.

## 118 **Patient and Public Involvement**

119 Drivers from Mekelle city have involved in the study for interview regarding RTAs.

## 120 **Data Quality Control**

121 Pre-test was done on 5% of the sample at Adigrat town, Tigray region. Based on the pretest  
122 findings, necessary corrections were made to the questionnaire. Adequate supervision was  
123 undertaken by the supervisors and principal investigator during the data collection. Daily spot-

1  
2  
3 124 checking of filled questionnaires for errors or any incompleteness was done by the supervisors and  
4  
5 125 the principal investigator.  
6  
7

### 8 126 **Data management and analysis**

9  
10  
11 127 The collected data were entered and cleaned in Microsoft excel 2007. Then, the data were exported  
12  
13 128 and analyzed using STATA version 12. Values of categorical variables were presented as  
14  
15 129 frequencies and percentages. All statistical tests were performed at the 5% significance level.  
16  
17

18  
19 130 The dependent variable was a Road Traffic Accident (RTA) which was dichotomized into Yes  
20  
21 131 (labeled “1”) and No (labeled “0”). Each independent variable was cross tabulated with the  
22  
23 132 outcome variable and variables which showed significant association were further entered into the  
24  
25 133 bivariable binary logistic regression. Finally, variables significant in the bivariable analysis were  
26  
27 134 entered into multivariable binary logistic regression analysis to identify independent determinants  
28  
29 135 of RTA.  
30  
31  
32

33 136 Multi-collinearity was checked using Variance Inflation Factor (VIF) at a cutoff value of 10.  
34  
35 137 Variables with greater than 10 VIF value were handled by removing the most inter-correlated  
36  
37 138 variable(s) from the model and substitute their cross product as an interaction term. The final model  
38  
39 139 was developed using a step-wise logistic regression. Final model fitness was checked using the  
40  
41 140 Hosmer-Lemshew method. Receiver Operating Characteristic (ROC) curve was used to show how  
42  
43 141 much the independent variables in the final model predicted the dependent variable.  
44  
45  
46  
47  
48  
49  
50  
51  
52  
53  
54  
55  
56  
57

### 142 3. Results

#### 143 Socio-demographic characteristics of the respondents

144 The response rate in this study was 100%. The median (IQR) age of the respondents was 30 (10)  
 145 years. The majority of study participants (98.37%) were males. Regarding the marital status of the  
 146 respondents, 102 (41.46%), 101(41.06%), 30 (12.20%) and 13 (5.28%) were divorced, married,  
 147 single and widower respectively. The majority of the drivers, 170 (69.11%) were Christian  
 148 Orthodox, followed by Muslims, 54 (21.95%). With regard to their educational status, 225  
 149 (91.46%) had attained at least grade 5. The median (IQR) monthly income (in Birr) of the study  
 150 participants was 1000 (1200) (Table 1).

151 Table 1: Socio-demographic and economic characteristics of drivers in Mekelle city, Northern  
 152 Ethiopia, 2015. (n=246)

| Variables                            | Frequency   | Percentage |
|--------------------------------------|-------------|------------|
| Age in years, median (IQR)*          | 30 (10)     |            |
| Monthly income in Birr, median (IQR) | 1000 (1200) |            |
| Sex                                  |             |            |
| Male                                 | 242         | 98.37      |
| Female                               | 4           | 1.63       |
| Marital status                       |             |            |
| Married                              | 101         | 41.06      |
| Single                               | 30          | 12.20      |
| Divorced                             | 102         | 41.46      |
| Widower                              | 13          | 5.28       |
| Religion                             |             |            |
| Orthodox                             | 170         | 69.11      |
| Muslim                               | 54          | 21.95      |
| Protestant                           | 8           | 3.25       |
| Catholic                             | 14          | 5.69       |
| Educational status                   |             |            |
| Illiterate                           | 17          | 6.91       |
| Primary (Grade 1-4)                  | 4           | 1.63       |
| Secondary (Grade 5-10)               | 121         | 49.19      |

---

|           |                                        |     |       |
|-----------|----------------------------------------|-----|-------|
|           | Preparatory & above (Grade 11 & above) | 104 | 42.28 |
| Ethnicity | Tigraway/ti                            | 222 | 90.24 |
|           | Amhara                                 | 17  | 6.91  |
|           | Afar                                   | 7   | 2.85  |

---

153 \* IQR: Inter Quartile Range

For peer review only

## 154 **Magnitude of road traffic accidents**

155 Among all the drivers included in this study, 57 (23.17%) had encountered a road traffic accident  
 156 in the past two years, from the time of the current study. Most of the accidents happened on  
 157 Monday, 22 (38.60%) and Friday, 13 (22.81%) even though accidents were reported in all the  
 158 seven days. The causes of the accidents, as reported by the drivers, were mainly due to violation  
 159 of traffic law in 22/57 ((38.60%) of the cases. A significant number of the accidents,  
 160 25/57 (43.86%) happened at dawn. Pedestrians and Cyclists constituted the major share of the  
 161 RTA, 31/57 (54.40%). About two third of the accidents, 43/57 (75.44%) happened at either T-  
 162 junction road or cross road (Table 2).

163 Table 2: Characteristics and Setting of RTA in Mekelle City, Northern Ethiopia. 2015. (n=246)

| Variables           |                            | Frequency | Percentage |
|---------------------|----------------------------|-----------|------------|
| Accident occurrence | Yes                        | 57        | 23.17      |
|                     | No                         | 189       | 76.83      |
| Type of accident    | Injury                     | 29        | 50.88      |
|                     | Injury and Property damage | 14        | 24.56      |
|                     | Property damage            | 8         | 14.0       |
|                     | Death                      | 6         | 10.5       |
| Light Condition     | At dawn                    | 41        | 71.93      |
|                     | Day time                   | 16        | 28.07      |
| Victim              | Pedestrian                 | 19        | 32.14      |
|                     | Cyclist                    | 12        | 21.43      |
|                     | Passenger                  | 14        | 25.00      |
|                     | Driver                     | 12        | 21.43      |
| Accident site road  | T-junction                 | 15        | 26.32      |
|                     | Cross Road                 | 28        | 49.12      |
|                     | Straight road              | 14        | 24.56      |
| Date of accident    | Monday                     | 22        | 38.60      |

|                                            |                                                 |    |       |
|--------------------------------------------|-------------------------------------------------|----|-------|
|                                            | Tuesday                                         | 4  | 7.02  |
|                                            | Wednesday                                       | 6  | 10.53 |
|                                            | Thursday                                        | 3  | 5.26  |
|                                            | Friday                                          | 13 | 22.81 |
|                                            | Saturday                                        | 9  | 15.79 |
| Number of accidents (life time experience) | 1                                               | 42 | 73.68 |
|                                            | 2                                               | 12 | 21.05 |
|                                            | 3                                               | 3  | 5.26  |
| Reason for the accident                    | Lack of general safety awareness of pedestrians | 10 | 18.52 |
|                                            | Violation of traffic rules and regulations      | 22 | 40.98 |
|                                            | Violation of speed Limit                        | 9  | 15.73 |
|                                            | Lack of vehicle maintenance                     | 13 | 24.77 |

#### 164 Risky driving behaviors

165 Concerning risky driving behaviors, 92 (37.40) of the drivers drunk alcohol before driving. About  
 166 43 (17.48%) of the drivers were chat chewers and 30 (12.20%) were smokers. More than one third  
 167 of the drivers, 96 (39.02%) reported that they used mobile for communication while driving (Table  
 168 3).

169 Table 3: Risky driving behaviors among drivers in Mekelle city, Northern Ethiopia, 2015. (n=246)

| Variables                |           | Frequenc<br>y | Percentag<br>e |
|--------------------------|-----------|---------------|----------------|
| Mobile use while driving | Yes       | 96            | 39.02          |
|                          | No        | 150           | 60.98          |
| Substance use            | Alcohol   | 92            | 37.40          |
|                          | Chat      | 43            | 17.48          |
|                          | Cigarette | 30            | 12.20          |
| Seat belt use            | Yes       | 204           | 82.93          |
|                          | No        | 42            | 17.07          |

|                                                    |                           |     |       |
|----------------------------------------------------|---------------------------|-----|-------|
| What do you do when another vehicle tries to pass? | I advise him to slow down | 32  | 13.01 |
|                                                    | I give him priority       | 144 | 58.54 |
|                                                    | I speed up                | 70  | 28.46 |
| A measure taken when there is heavy traffic        | Pass accordingly          | 3   | 1.22  |
|                                                    | Speed up                  | 16  | 6.50  |
|                                                    | Slow down speed           | 227 | 92.28 |

## 170 Factors associated with Road Traffic Accidents

### 171 Multivariable logistic regression analysis

172 Multivariable binary logistic regression showed that drivers who consumed alcohol on driving  
 173 were 2.29 times (AOR=2. 29; 95% CI: 1.08-4.85) more likely to have RTA compared to drivers  
 174 who did not consume alcohol. Drivers who drove governmental vehicles were 4.16 (AOR=4. 16;  
 175 95% CI: 1.48- 11.70) times more likely to have RTA compared to drivers of privately owned  
 176 vehicles. As the driver's experience increased by one year, the probability of RTA decreased by  
 177 26% (AOR=0. 74; 95% CI: 0.60-0.90) (Table 4).

178 Table 4: Bivariable and multivariable logistic regression of road traffic accident by background  
 179 characteristics in Mekelle city, Northern Ethiopia, 2015. (n=246)

| Variables      |            | COR(95% CI)          | AOR(95% CI)      |
|----------------|------------|----------------------|------------------|
| Age            |            | 0.08(0.041, 0.121)*  | 1.05(0.98, 1.12) |
| Marital status | Married    | 0.85(0.348, 2.086)*  | 1.62(0.60, 4.39) |
|                | Single     | 0.37 (0.141, 0.972)* | 0.94(0.25, 3.45) |
|                | Divorced   | 1(Ref.)              | 1(Ref.)          |
|                | Widower    | 2.72(0.711, 10.408)  |                  |
| Religion       | Protestant | 1(Ref.)              | 1(Ref.)          |
|                | Orthodox   | 0.22( 0.052, 0.940)* | 0.24(0.05, 1.26) |
|                | Muslim     | 0.45( 0.102, 2.059)  |                  |
|                | Catholic   | 0.55( 0.095, 3.245)  |                  |
| Ethnicity      | Afar       | 1(Ref.)              | 1(Ref.)          |
|                | Amhara     | 0.12(0.011, 1.195)   |                  |

|                                                   |                              |                       |                     |
|---------------------------------------------------|------------------------------|-----------------------|---------------------|
|                                                   | Tigraway/ti                  | 0.04( 0.004, 0.351)*  | 0.04(0.005, 0.58)*  |
| Vehicle ownership                                 | Private (Driver is employee) | 1(Ref.)               | 1(Ref.)             |
|                                                   | Governmental                 | 3.5( 1.464, 8.168)*   | 4.16( 1.48, 11.70)* |
|                                                   | Driver (Driver is the owner) | 2.38( 1.225, 4.660)*  | 1.64(0.71, 3.339)   |
| License grade                                     | 1 <sup>st</sup>              | 1(Ref.)               |                     |
|                                                   | 3 <sup>rd</sup>              | 1.36(0.329, 5.632)    |                     |
|                                                   | 4 <sup>th</sup>              | 0.55(0.138, 2.241)    |                     |
|                                                   | Special                      | 1.52(0.249, 9.294)    |                     |
| Alcohol use                                       | No                           | 1(Ref.)               | 1(Ref.)             |
|                                                   | Yes                          | 1.88(1.034, 3.437)*   | 2.29(1.08, 4.85)*   |
| Substance use other than alcohol                  | Chat                         | 2.12.(1.010, 4.478)*  | 2.18(0.78, 6.05)    |
|                                                   | Cigarette                    | 2.55(1.105, 5.884)*   | 1.11(0.39, 3.18)    |
|                                                   | I do not use                 | 1(Ref.)               | 1(Ref.)             |
| Mobile use                                        | No                           | 1(Ref.)               | 1(Ref.)             |
|                                                   | Yes                          | 2.27(1.246, 4.150)*   | 1.80(0.86, 3.74)    |
| What do you do when another vehicle tries to pass | I advise him to slow down    | 1(Ref.)               |                     |
|                                                   | I give him priority          | 2.88(0.952, 8.724)    |                     |
|                                                   | I speed up                   | 1.3(0.38, 4.463)      |                     |
| Income                                            |                              | 1.00(0.999, 1.000)    |                     |
| Distance travelled                                |                              | 1.00(0.999, 1.005)    |                     |
| Driver's experience                               |                              | 0.86 (0. 749, 0.999)* | 0.74(0.60, 0.90)*   |
| Vehicle service                                   |                              | 1.24(1.103, 1.398)*   | 1.18(0.99, 1.40)    |

180 \*P-value less than 0.05

181 The residuals were checked for influential outlier observations and the result showed that there  
 182 were no suspicious influential outlier observations. Hosmer and Lemshow test showed a chi-square  
 183 value of 9.41 (p=0. 3085) which is greater than 0.05. The null hypothesis is not to be rejected,  
 184 which implies that the model estimates adequately to fit the data at an acceptable level. The area  
 185 under ROC curve was 0.7536 (See figure 2). The predicting power of the independent variables  
 186 for the dependent variable was 75.36%. Therefore, it can be concluded that the model fits the data  
 187 reasonably well.



#### 188 4. Discussion

189 The main aim of the study was to assess the magnitude and determinants of road traffic accidents  
190 among drivers in Mekelle city, Tigray, Northern Ethiopia. The study revealed that the magnitude  
191 of self-reported RTA in Mekelle city was 23.17%.

192 There was a slight increment of accidents in this study compared to the previous study done in  
193 Mekelle city, which showed that the prevalence of road traffic accident was 22% [9]. This variation  
194 might be due to the fact that the city is expanding where the population size is increasing. However,  
195 it is lower when compared with a similar study conducted among taxi drivers with 4 wheels, of  
196 which 26.4% of them reported RTA encounter within the past 3 years [12]. The difference might  
197 be due to the differences in the RTAs report period where the current study included reports of  
198 RTA in the past 2 years from the time of the study.

199 The study identified that ownership of the vehicles was found to be predictor of road traffic  
200 accident. Road traffic accident was 3.78 times more likely among those who drove governmental  
201 vehicles. Though literatures did not show supportive or contradicting idea for this finding, this  
202 finding might be due to the fact that governmental drivers might violate the traffic rules and use  
203 high speed to take their workers to their offices especially at the peak hours.

204 This study revealed that driver behavior on alcohol consumption while driving was found to be an  
205 aggravating factor for RTA. Drivers who drive after consuming alcohol was 2.29 more likely to  
206 have RTA compared to those who don't drink alcohol. This finding is similar to a similar study  
207 which indicated that individuals who drank alcohol were 3.2 times more likely to get road traffic  
208 accident [13]. It was also supported by the Great Britain department for Transport provisional  
209 estimates for 2013, which showed that between 230 and 290 people, were killed in accidents in

1  
2  
3 210 Great Britain, where at least one driver was over the drink drive limit [14]. This might be due to  
4  
5 211 the nature of alcohol that has a range of psycho-motor and cognitive effects, including attitude,  
6  
7 212 judgment, vigilance, perception, reaction, and controlling [15]. This can cause an increase in  
8  
9 213 accident risk on reaction times by lowering cognitive processing, coordination, attention, vision  
10  
11 214 and hearing.  
12  
13  
14

15 215 This study has also revealed that as a driver's experience increases by one year, the probability of  
16  
17 216 getting RTA decreased by 26 percent. This finding was similar to the finding of a study in 2003  
18  
19 217 which showed as the drive miles and experience increases, the probability of self-reported crash  
20  
21 218 was decreased [16]. This might be due to the anticipation of potentially hazardous traffic situations  
22  
23 219 require years of practice.  
24  
25  
26

27  
28 220 Mobile usage while driving was significantly associated with RTA. This study is consistent with  
29  
30 221 a previously done study in Mekelle city [12]. This is because of loss of attention to surroundings  
31  
32 222 while driving. The findings of this study showed that part time and visual impairment were not  
33  
34 223 found to be a predictor variable for road traffic accident. But a study done in Ibadan town Nigeria  
35  
36 224 showed that drivers who had part time jobs were 2.6 times more likely to have traffic accident [3].  
37  
38 225 Similarly the study of Ibadan indicated that drivers who had visual impairment were 1.6 times  
39  
40 226 more likely to have traffic accident [3]. Therefore, this needs further investigation to explain these  
41  
42 227 relationships.  
43  
44  
45  
46  
47

## 48 228 **5. Conclusion**

49  
50

51 229 The magnitude of RTA was high. Driving a governmental vehicle and alcohol consumption were  
52  
53 230 the factors associated with RTA. Monitoring blood alcohol level of drivers should be in place.  
54  
55  
56  
57

231 Holistic study should be done to identify the causes of RTA. This study may have a role in  
232 monitoring the RTAs which is the main public health problem at this time.

## 233 **6. Disclosure section**

### 234 **Acknowledgments**

235 We are glad to extend our gratitude to the data collectors and participants of the study. We would like to  
236 extend our gratitude to Mekelle University as well for funding the research.

### 237 **Author contributions**

238 AW and AD conceptualized and designed the study. AW, AD, and TW were involved in data  
239 analyses, drafting the manuscript, critically revising the manuscript and final review.

### 240 **Disclosure statement**

241 No potential conflict of interest was reported by the authors.

### 242 **Ethics and consent**

243 Ethical clearance and approval was given by Mekelle University, school of public health Ethical  
244 Review Committee with the approval number of ERC 0017/2014. Written consent was taken  
245 from each participant during the interview. All authors read and approved the final manuscript.

### 246 **Data availability**

247 The data set of the study findings are available from the corresponding author upon reasonable  
248 request.

### 249 **Funding**

250 This study was funded by Mekelle University for research and community services.

## 251 **Supplementary Materials**

252 **S1. This is the S1 File questionnaire.** This is the S1 File questionnaire in English version which  
253 was used to collect data for this study.

254 **S2. This is the S2 File questionnaire.** This is the S2 File questionnaire in local language  
255 (Tigrigna) version which was used to collect data for this study.

## 256 **Figures**

257 Fig 1. Sampling Procedure. Schematic presentation of the sampling technique

258 Fig 2. ROC curve. Predicting power of the independent variables for the dependent variable

## 259 **7. References**

- 260 1. The Wikipedia encyclopedia. *Traffic collision*. Available  
261 from [http://en.wikipedia.org/wiki/Traffic\\_collision](http://en.wikipedia.org/wiki/Traffic_collision) [accessed 20th October 2014]
- 262 2. WHO. World report on road traffic injury prevention: summary. 2004
- 263 3. Bekibele CO, Fawole OI, Bamgboye AE, Adekunle LV, Ajav R, Baiyeroju AM. Risk factors for  
264 road traffic accidents among drivers of public institutions in Ibadan, Nigeria. *African Journal*  
265 *Health Science*. 2007; 14:137-142.
- 266 4. World Medical Association. Statement on Traffic Injury. In: WMA General Assembly (ed.).  
267 Pilanesberg, South Africa. October, 2006. Available from  
268 <http://bioetika.ktf.cuni.cz/articles.php?lng=cz&pg=119> [accessed 21<sup>st</sup> October 2014]
- 269 5. World Health Organization. World health rankings. Live longer live better. 2011. USA
- 270 6. Abuhamoud MA, Rahmat RA, Ismail A. Transportation and its Concerns in Africa: A Review.  
271 *The Social Science*. 2011; 6: 51-63. Available from DOI: 10.3923/sscience.2011.51.63
- 272 7. WHO World health rankings. Live longer live better. 2013. USA.

- 1  
2  
3 273 8. Peden M, Scurfield R, Sleet D: World report on road traffic injury prevention 2004.  
4  
5  
6 274 9. Hassan A, Godesso A, Abebe L, Girma E. Risky driving behaviors for road traffic accident among  
7  
8 275 drivers in Mekele city, Northern Ethiopia. BMC Research Notes. 2011; 4:535  
9  
10 276 10. Mekelle Town Police Commission Office. Report on road traffic accident Mekele; 2009.  
11  
12 277 11. Rankank.com. retrieved from: <http://mekelleadministration.gov.et.rankank.com> [accessed 14th  
13  
14 278 Dec 2014]  
15  
16  
17 279 12. Asefa NG, Ingale L, Shumey A, Yang H (2015) Prevalence and Factors Associated with Road  
18  
19 280 Traffic Crash among Taxi Drivers in Mekelle Town, Northern Ethiopia, 2014: A Cross Sectional  
20  
21 281 Study.2015; PLoS ONE. 10(3): e0118675. Available from:  
22  
23 282 <https://doi.org/10.1371/journal.pone.0118675> [accessed 15th December 2015]  
24  
25  
26 283 13. Connor J, Norton R, Ameratunga S, Jackson R. The contribution of alcohol to serious car crash  
27  
28 284 injuries. Section of Epidemiology and Biostatistics, School of Population Health, University of  
29  
30 285 Auckland, New Zealand.  
31  
32  
33 286 14. Great Britain Department for Transport. Estimates for reported road traffic accidents involving  
34  
35 287 illegal alcohol levels: 2013 (second provisional) Self-reported drink and drug driving for 2013/14.  
36  
37 288 Statistical release. 2015. Available from:  
38  
39 289 [https://assets.publishing.service.gov.uk/government/uploads/system/uploads/attachment\\_data/file/  
40  
41 402698/rrcgb-drink-drive-2013-prov.pdf](https://assets.publishing.service.gov.uk/government/uploads/system/uploads/attachment_data/file/402698/rrcgb-drink-drive-2013-prov.pdf) [Accessed 15th June 2015]  
42  
43  
44  
45 291 15. Zhao X, Zhang X, Rong J. Study of the Effects of Alcohol on Drivers and Driving Performance on  
46  
47 292 Straight Road. Hindawi Publishing Corporation Mathematical Problems in Engineering. 2014;  
48  
49 293 Article ID 607652, 9 pages. Available from: <http://dx.doi.org/10.1155/2014/607652> [Accessed  
50  
51 294 25th October 2018]  
52  
53  
54  
55  
56  
57  
58  
59  
60

- 1  
2  
3 295 16. Rolison JJ, Regev S, Moutari S, Feeney A. What are the factors that contribute to road accidents?  
4  
5 296 An assessment of law enforcement views, ordinary drivers' opinions, and road accident records.  
6  
7 297 Accident Analysis & Prevention. 2018; 115: 11-24  
8  
9  
10  
11  
12  
13  
14  
15  
16  
17  
18  
19  
20  
21  
22  
23  
24  
25  
26  
27  
28  
29  
30  
31  
32  
33  
34  
35  
36  
37  
38  
39  
40  
41  
42  
43  
44  
45  
46  
47  
48  
49  
50  
51  
52  
53  
54  
55  
56  
57  
58  
59  
60

For peer review only

1  
2  
3  
4  
5  
6  
7  
8  
9  
10  
11  
12  
13  
14  
15  
16  
17  
18  
19  
20  
21  
22  
23  
24  
25  
26  
27  
28  
29  
30  
31  
32  
33  
34  
35  
36  
37  
38  
39  
40  
41  
42  
43  
44  
45  
46  
47  
48  
49  
50  
51  
52  
53  
54  
55  
56  
57  
58  
59  
60

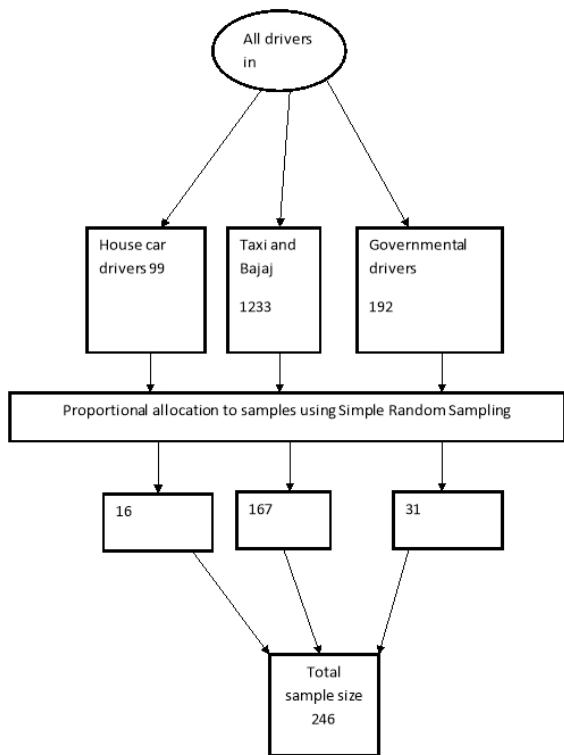

Figure 1: Sampling Procedure. Schematic presentation of the sampling technique.

Schematic presentation of the sampling procedure

69x89mm (300 x 300 DPI)

1  
2  
3  
4  
5  
6  
7  
8  
9  
10  
11  
12  
13  
14  
15  
16  
17  
18  
19  
20  
21  
22  
23  
24  
25  
26  
27  
28  
29  
30  
31  
32  
33  
34  
35  
36  
37  
38  
39  
40  
41  
42  
43  
44  
45  
46  
47  
48  
49  
50  
51  
52  
53  
54  
55  
56  
57  
58  
59  
60

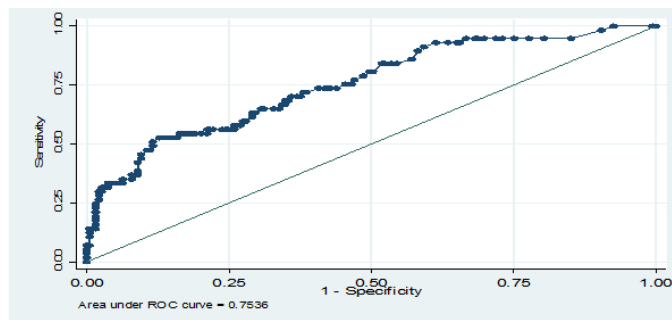

Figure 2: ROC curve. Predicting power of the independent variables for Road Traffic Accident.

ROC curve

69x89mm (300 x 300 DPI)



## Supplementary Files

### S1 Questionnaire in English Version

#### I. Questionnaire related to socio-demographic characteristics of drivers

- 1) Age of the driver \_\_\_\_\_
- 2) Sex of the driver                    A)Male                    B)Female
- 3) Marital status    A) Married                    B)Single                    C)Divorced                    D)widowed
- 4) Religion of the driver    A)Orthodox                    B)Muslim                    C)Protestant                    D)Catholic
- 5) Educational status of the driver A) Illiterate B) 1-4 C) 5-10 D) Greater than grade 10
- 6) Ethnicity A)Tigray B) Amhara C)Oromo D) Others
- 7) Monthly income \_\_\_\_\_

#### II. Questionnaire related to determinant factors of road traffic accident

1. What is the type of road mostly you use? A)Gravel B)Asphalt C)Coble stone
2. What kind of vehicle do you drive most often??  
A) Automobile B) Minibus C) truck D) Bus E) Liquid Cargo F) Bajaj
3. Vehicle Years of Service/This is the number of years since the date the vehicle is manufactured/ \_\_\_\_\_
4. What did you tell me about your vehicle insurance A)Insured B)Non-insured/
5. Work experience in years? \_\_\_\_\_ years
6. To whom does the car belongs to? A)Governmental B) Private employer C)Driver
7. Did you provide service to your car? A.)Yes B) No
8. If yes to the above question how many times per a year? A)1 B)2 C)3 D)4 E)5
9. What is your License grade of driving? A)No License B Special C)1<sup>st</sup> D)3<sup>rd</sup> E)4<sup>th</sup> F)2<sup>nd</sup>

- 1  
2  
3 10. Did you use alcohol before or after deriving A.)Yes B) No  
4  
5  
6 11. Which one of the following substance did you use before or after deriving  
7  
8 A.)Chat B) Cigarette C) Shisha D) Mariwana E) Others  
9  
10 12. Did you use seat belt while you are driving? A.)Yes B) No  
11  
12 13. Distance traveled per day\_\_\_\_\_
- 13  
14 14. Have you faced road traffic accident? A.)Yes B) No  
15  
16 15. If yes what was the day\_\_\_\_\_
- 17  
18 16. What was the Light Condition  
19  
20 A Day Light B) Dusk C) Dawn D) Night with Light E) Night with Weak Light  
21  
22 17. What was the reason for the accident  
23  
24 A. Lack of general safety awareness by pedestrians  
25  
26 B. Disrespect of traffic rules and regulations  
27  
28 C. Animal drawn carts and animals frequently using in main highways  
29  
30 D. Violation of speed Limit  
31  
32 E. Lack of vehicle maintenance  
33  
34 F. Others/specify  
35  
36 18. Who was the victim of your accident A, Pedestrians B, cyclist C, passengers D, Driver  
37  
38 E)animal  
39  
40 19. What was the road Junction/ A)T-Shape, B)Cross Road, C)Roundabout/  
41  
42  
43 20. How many accidents did you faced\_\_\_\_\_
- 44  
45 21. Type of accident A)injury B)kill animals C)property damages D)Kill pedestrian  
46  
47  
48 22. What did you do when somebody wants to pass you?  
49  
50 A) I tend to pass other cars more often than other cars pass me  
51  
52  
53  
54  
55  
56  
57  
58  
59  
60

B) I tend to pass me more often

C) If possible I told him/her to slow down in order to pass

23. What did you do in heavy traffic?

A) Stay with the slower moving traffic

B) Keep up with the faster traffic

C) Both or about equally

24. Have you ever received a ticket, citation, or warning for any traffic violation other than parking a.)yes b) No

25. Did you use mobile while you are driving your vehicle? A.)yes b) No

26. Do you have visual impairment A.)yes b) No

27. While you drive did you limit your speed A.)yes b) No

28. Did you have part time work? A.) yes b) No

29. Did you listen radio? A.) yes b) No

**S2 Questionnaire in local language (Tigrigna) Version**

I. ውልቃዊ መረዳኢታ ዝምልከቱ ሕቶታት

1. ዕድመ \_\_\_\_\_

2. ዶታ ሀ) ተባዕታይ ለ) ኣነስታይ

3. ኩነታት ሓዳር ሀ) ዝተመርዓወ/ት ለ) ዘይተመርዓወት ሐ) ዝፈትሐ/ት መ) ሰበይቱ/ሰብኣይ ዝሞቶ/ታ

4. ሃይማኖት ሀ) ክርስትያን ለ) ሙስሊም ሐ) ካቶሊክ መ) ፕሮቴስታንት

5. ደረጃትምህርቲ ሀ) ዘይተምሃረ ለ) ካብ 1ይ-4ይ ሐ) ካብ 5ይ-10ይ መ) ካብ 10ይ ንላዕሊ

6. ዓሌት ሀ) ትግራይ ለ) ኣምሓራ ሐ) ኣሮሞ መ) ዓፋር

7. ወርሐዊ ኢታዊካክንደይ እዩ \_\_\_\_\_

II. መንቀሊሓደጋት ራፊክዝም ልክቱቶታት

1. መብዛሕትኡ ግዘ እትጓዳዘሉ ዓይነት መንገዲ ሀ) አስፋልቲ ለ) ፀፀር ሐ) ኮብል ስቶን

2. እትዝውራ ዓይነት መኪና ሀ) አውቶሞቢል ለ) ታክሲ ሐ) አውቶቡስ መ) ናይ ረሳሕ ፈሳሲ መጓጓዣ ረ) ባጃጅ

3. ካብ እትስረሐሉ እዋን ጀሚሩ ግልጋሎት እታ መኪና ክንደይ ዓመት እዩ \_\_\_\_\_

4. ከነታት ኢንፎርጋንስ መኪናኻ እንታይ ይመስል

ሀ) ኢንፎርጋንስ አለዎ ለ) ኢንፎርጋንስ የብላን

5. ስራሕ ልምዶም ክንደይ እዩ \_\_\_\_\_ ዓመት

6. እዛ መኪና ናይ መን እዩ ሀ) መንግስታዊ ለ) ባዓል ሃፍቲ ሐ) ባዕለይ

7. መኪናኡም ዓመታዊ ፅገና ይገብሩላዮ ሀ) እወ ለ) ኣይገብርን

8. መልሶም እወ እንተኮይኑ ክንደይ ግዘ ሀ) 1 ለ) 2 ሐ) 3 መ) ልዕሊ 4

9. ደረጃ መዘወሪ ፍቓዶም ክንደይ እዩ ሀ) ፍቓድ የብለይን ለ) ፍሉይ ፍቓድ ሐ) 1ይመ) 3ይረ) 4ይ

10. ቅድሚ ምዝዋርም ይኹን ኣብ ዝዝውርሉ እዋን ሰትዮምዶ ይፈልጡ

ሀ) እወ ለ) ኣይፈልጥን

11. ኣብ ክለምግናሕ መኪና ካብዞም ዝስዕቡ ኣይናይ ትጥቀም

ሀ) ጫት ለ) ሽጋራ ሐ) ሸሻ መ) ማሪዋና ረ) ካልእ ይጠቀስ

12. ኣብ ደረቶም ዝግበር ዕጥቂ ይጥቀሙዮ ሀ) እወ ለ) ኣይጥቀምን

13.አብ መዓልቲ ክንደይ ኪሎሜትር ትጓዝ \_\_\_\_\_

14) ሓደጋ መኪና በዊሑካዶ ይፈልጥ ሀ) እወ ለ) ኣይፈልጥን

15) መልሶም እወ እንተኮይኑ ኣበይናይ መዓልቲ ነይሩ \_\_\_\_\_

16) ኩነታት መብራህቲ እንታይ ነይሩ ሀ) ድሁር ቀትሪ ለ) ኣጋግዘ

ሐ) ምብራህቲ ኣብ ዘለዎ ምሽት መ) ምሽት ኮይኑ ድኹም መብራህቲ ኣብ ዘለዎ

17.መንቀሊ እቲ ሓደጋ እንታይ እዩ ነይሩ ትብል

ሀ)ሓፈሻዊ ንቕሓት ተጉዳዝቲ ዘይምህላው ለ) ሕጊ ትራፊክ ዋጋ ዘይምህብ ሐ) እቲ ዋና መንገዲ ንእንስሳት መጎዳዳዚ ምውዓል

መ) ፍጥነት መኪና ዘይምሕላው ረ) መኪና ዘይምዕራይ ሰ) ካለእ

18.በቲ ሓደጋ ዝተጠቐሰ ኣካል እንታይ ነይሩ

ሀ) ብእግሩ ዝጓዝ ሰብ ለ) ሳይክል ዘዋሪ ሐ) ተጉዳዚ መ) ዘዋሪ መኪና

19.እቲ እትጓዝሉ ዝነበርካ መንገዲ እንታይ ዓይነት ነይሩ

ሀ) ፕ-ቅርፂ ዘለዎ ለ) መቋረፂ መንገዲ ሐ) ትኽ ዝበለ መንገዲ

20.ክንደይ ሓደጋታት በዊሑም ካይፈልጥ \_\_\_\_\_

21.ዝበፀሐ ዓይነት ሓደጋ እንታይ ነይሩ

ሀ)መጉዳእቲ ለ)ቅትለት እንስሳ ሐ)ሓደጋ ንብረት መ) ናይ ሰብ ሞት

22.ሓደ በዓል መኪና ከቋርፀካ እንተሎ እንታይ ትገብር

ሀ) ቅድሚ ምሕላፊን ክቕድመን ይመክር ለ) መብዛሕትኡ ግዘ ክሓልፋኒ ይፈቕደለን

ሐ)እንተተካኢሉ ቀስ ኢሉ ንክጓዝ ይመክሮ ::

23. መንገድ አብ ዝተጨናነቐሉ እዋን እንታይ ትገብር

ሀ) ቀስ ኢሉ ክሕልፎ ይፅዕር ለ) ቀልጢፊ ክሓልፍ ይፅዕር ሐ) ዳርጋ ማዕረ

24. ካብ ናይ መዕረፊ መኪና ክፍሊ ትቅብሊት /Parking/ ወፃኢ ብናይ ትራፊክ ሕጊ ዘይምኽባር ተቐባዕነት ትፈልጥ ሀ) እወ

ለ) ኣይፈልጥን

25. ኣብ እተሸከርከረሉ ግዘ ስልኪ/Mobile/ ትጥቀምዶ; ሀ) እወ ለ) ኣይጥቀምን

26. ናይ ምርኣይ ፀገም ዶ ኣለካ ሀ) እወ ኣለኒ ለ) የብለይን

27. ኣብ እትዝውረሉ እዋን ፍጥነት መኪናካ ሓሊካ ዶ ነይርካ

ሀ) እወ ለ) ኣይሓለኩን

28. ትርፌ ሰዓት ትሰርሕ ዶ; ሀ) እወ ይሰርሕ ለ) ኣይሰርሕን

29. ብዛዕባ ትራፊክ ዝምልከቱ ፈነወታት ራዲዮ ትከታተል ዶ

ሀ) እወ ይከታተል ለ) ኣይከታተልን

# Reporting checklist for cross sectional study.

Based on the STROBE cross sectional guidelines.

## Instructions to authors

Complete this checklist by entering the page numbers from your manuscript where readers will find each of the items listed below.

Your article may not currently address all the items on the checklist. Please modify your text to include the missing information. If you are certain that an item does not apply, please write "n/a" and provide a short explanation.

Upload your completed checklist as an extra file when you submit to a journal.

In your methods section, say that you used the STROBE cross sectional reporting guidelines, and cite them as:

von Elm E, Altman DG, Egger M, Pocock SJ, Gøtzsche PC, Vandenbroucke JP. The Strengthening the Reporting of Observational Studies in Epidemiology (STROBE) Statement: guidelines for reporting observational studies.

|                            | Reporting Item                                                                                                                                                                                                                                                                          | Page Number |
|----------------------------|-----------------------------------------------------------------------------------------------------------------------------------------------------------------------------------------------------------------------------------------------------------------------------------------|-------------|
| Title                      | <a href="#">#1a</a> Indicate the study's design with a commonly used term in the title or the abstract                                                                                                                                                                                  | 1           |
| Abstract                   | <a href="#">#1b</a> Provide in the abstract an informative and balanced summary of what was done and what was found                                                                                                                                                                     | 2           |
| Background / rationale     | <a href="#">#2</a> Explain the scientific background and rationale for the investigation being reported                                                                                                                                                                                 | 3           |
| Objectives                 | <a href="#">#3</a> State specific objectives, including any prespecified hypotheses                                                                                                                                                                                                     | 4           |
| Study design               | <a href="#">#4</a> Present key elements of study design early in the paper                                                                                                                                                                                                              | 4           |
| Setting                    | <a href="#">#5</a> Describe the setting, locations, and relevant dates, including periods of recruitment, exposure, follow-up, and data collection                                                                                                                                      | 4           |
| Eligibility criteria       | <a href="#">#6a</a> Give the eligibility criteria, and the sources and methods of selection of participants.                                                                                                                                                                            | 4           |
|                            | <a href="#">#7</a> Clearly define all outcomes, exposures, predictors, potential confounders, and effect modifiers. Give diagnostic criteria, if applicable                                                                                                                             | 7           |
| Data sources / measurement | <a href="#">#8</a> For each variable of interest give sources of data and details of methods of assessment (measurement). Describe comparability of assessment methods if there is more than one group. Give information separately for for exposed and unexposed groups if applicable. | 6           |
| Bias                       | <a href="#">#9</a> Describe any efforts to address potential sources of bias                                                                                                                                                                                                            | 6           |
| Study size                 | <a href="#">#10</a> Explain how the study size was arrived at                                                                                                                                                                                                                           | 6           |
| Quantitative               | <a href="#">#11</a> Explain how quantitative variables were handled in the analyses. If applicable,                                                                                                                                                                                     | 7           |

|           |                     |                                                                                                                                                                                                                                                                                                     |                                                               |
|-----------|---------------------|-----------------------------------------------------------------------------------------------------------------------------------------------------------------------------------------------------------------------------------------------------------------------------------------------------|---------------------------------------------------------------|
| variables |                     | <i>describe which groupings were chosen, and why</i>                                                                                                                                                                                                                                                |                                                               |
| 1         |                     |                                                                                                                                                                                                                                                                                                     |                                                               |
| 2         | Statistical methods | <a href="#">#12a</a> Describe all statistical methods, including those used to control for confounding                                                                                                                                                                                              | 7                                                             |
| 3         |                     |                                                                                                                                                                                                                                                                                                     |                                                               |
| 4         |                     | <a href="#">#12b</a> Describe any methods used to examine subgroups and interactions                                                                                                                                                                                                                | 7                                                             |
| 5         |                     |                                                                                                                                                                                                                                                                                                     |                                                               |
| 6         |                     | <a href="#">#12c</a> Explain how missing data were addressed                                                                                                                                                                                                                                        | N/A                                                           |
| 7         |                     |                                                                                                                                                                                                                                                                                                     |                                                               |
| 8         |                     | <a href="#">#12d</a> If applicable, describe analytical methods taking account of sampling strategy                                                                                                                                                                                                 | N/A                                                           |
| 9         |                     |                                                                                                                                                                                                                                                                                                     |                                                               |
| 10        |                     | <a href="#">#12e</a> Describe any sensitivity analyses                                                                                                                                                                                                                                              | N/A                                                           |
| 11        |                     |                                                                                                                                                                                                                                                                                                     |                                                               |
| 12        | Participants        | <a href="#">#13a</a> Report numbers of individuals at each stage of study—eg numbers potentially eligible, examined for eligibility, confirmed eligible, included in the study, completing follow-up, and analysed. Give information separately for for exposed and unexposed groups if applicable. | <i>n/a there were no stages and study was not on patients</i> |
| 13        |                     |                                                                                                                                                                                                                                                                                                     |                                                               |
| 14        |                     | <a href="#">#13b</a> Give reasons for non-participation at each stage                                                                                                                                                                                                                               | <i>n/a</i>                                                    |
| 15        |                     |                                                                                                                                                                                                                                                                                                     |                                                               |
| 16        |                     | <a href="#">#13c</a> Consider use of a flow diagram                                                                                                                                                                                                                                                 | 6                                                             |
| 17        |                     |                                                                                                                                                                                                                                                                                                     |                                                               |
| 18        | Descriptive data    | <a href="#">#14a</a> Give characteristics of study participants (eg demographic, clinical, social) and information on exposures and potential confounders. Give information separately for exposed and unexposed groups if applicable.                                                              | 7                                                             |
| 19        |                     |                                                                                                                                                                                                                                                                                                     |                                                               |
| 20        |                     | <a href="#">#14b</a> Indicate number of participants with missing data for each variable of interest                                                                                                                                                                                                | N/A                                                           |
| 21        |                     |                                                                                                                                                                                                                                                                                                     |                                                               |
| 22        | Outcome data        | <a href="#">#15</a> Report numbers of outcome events or summary measures. Give information separately for exposed and unexposed groups if applicable.                                                                                                                                               | 11                                                            |
| 23        |                     |                                                                                                                                                                                                                                                                                                     |                                                               |
| 24        | Main results        | <a href="#">#16a</a> Give unadjusted estimates and, if applicable, confounder-adjusted estimates and their precision (eg, 95% confidence interval). Make clear which confounders were adjusted for and why they were included                                                                       | 11                                                            |
| 25        |                     |                                                                                                                                                                                                                                                                                                     |                                                               |
| 26        |                     | <a href="#">#16b</a> Report category boundaries when continuous variables were categorized                                                                                                                                                                                                          | N/A                                                           |
| 27        |                     |                                                                                                                                                                                                                                                                                                     |                                                               |
| 28        |                     | <a href="#">#16c</a> If relevant, consider translating estimates of relative risk into absolute risk for a meaningful time period                                                                                                                                                                   | <i>n/a estimates were for odds ratio</i>                      |
| 29        |                     |                                                                                                                                                                                                                                                                                                     |                                                               |
| 30        | Other analyses      | <a href="#">#17</a> Report other analyses done—e.g., analyses of subgroups and interactions, and sensitivity analyses                                                                                                                                                                               | 12                                                            |
| 31        |                     |                                                                                                                                                                                                                                                                                                     |                                                               |
| 32        | Key results         | <a href="#">#18</a> Summarise key results with reference to study objectives                                                                                                                                                                                                                        | 7- 12                                                         |
| 33        |                     |                                                                                                                                                                                                                                                                                                     |                                                               |
| 34        | Limitations         | <a href="#">#19</a> Discuss limitations of the study, taking into account sources of potential bias or imprecision. Discuss both direction and magnitude of any potential bias.                                                                                                                     | 3                                                             |
| 35        |                     |                                                                                                                                                                                                                                                                                                     |                                                               |
| 36        | Interpretation      | <a href="#">#20</a> Give a cautious overall interpretation considering objectives, limitations, multiplicity of analyses, results from similar studies, and other relevant evidence.                                                                                                                | 13                                                            |
| 37        |                     |                                                                                                                                                                                                                                                                                                     |                                                               |
| 38        | Generalisability    | <a href="#">#21</a> Discuss the generalisability (external validity) of the study results                                                                                                                                                                                                           | 15                                                            |
| 39        |                     |                                                                                                                                                                                                                                                                                                     |                                                               |
| 40        | Funding             | <a href="#">#22</a> Give the source of funding and the role of the funders for the present study and, if                                                                                                                                                                                            | 15                                                            |
| 41        |                     | For peer review only - <a href="http://bmjopen.bmj.com/site/about/guidelines.xhtml">http://bmjopen.bmj.com/site/about/guidelines.xhtml</a>                                                                                                                                                          |                                                               |
| 42        |                     |                                                                                                                                                                                                                                                                                                     |                                                               |
| 43        |                     |                                                                                                                                                                                                                                                                                                     |                                                               |
| 44        |                     |                                                                                                                                                                                                                                                                                                     |                                                               |
| 45        |                     |                                                                                                                                                                                                                                                                                                     |                                                               |
| 46        |                     |                                                                                                                                                                                                                                                                                                     |                                                               |
| 47        |                     |                                                                                                                                                                                                                                                                                                     |                                                               |
| 48        |                     |                                                                                                                                                                                                                                                                                                     |                                                               |
| 49        |                     |                                                                                                                                                                                                                                                                                                     |                                                               |
| 50        |                     |                                                                                                                                                                                                                                                                                                     |                                                               |
| 51        |                     |                                                                                                                                                                                                                                                                                                     |                                                               |
| 52        |                     |                                                                                                                                                                                                                                                                                                     |                                                               |
| 53        |                     |                                                                                                                                                                                                                                                                                                     |                                                               |
| 54        |                     |                                                                                                                                                                                                                                                                                                     |                                                               |
| 55        |                     |                                                                                                                                                                                                                                                                                                     |                                                               |
| 56        |                     |                                                                                                                                                                                                                                                                                                     |                                                               |
| 57        |                     |                                                                                                                                                                                                                                                                                                     |                                                               |
| 58        |                     |                                                                                                                                                                                                                                                                                                     |                                                               |
| 59        |                     |                                                                                                                                                                                                                                                                                                     |                                                               |
| 60        |                     |                                                                                                                                                                                                                                                                                                     |                                                               |



*applicable, for the original study on which the present article is based*

1  
2  
3  
4  
5  
6  
7  
8  
9  
10  
11  
12  
13  
14  
15  
16  
17  
18  
19  
20  
21  
22  
23  
24  
25  
26  
27  
28  
29  
30  
31  
32  
33  
34  
35  
36  
37  
38  
39  
40  
41  
42  
43  
44  
45  
46  
47  
48  
49  
50  
51  
52  
53  
54  
55  
56  
57  
58  
59  
60

*The STROBE checklist is distributed under the terms of the Creative Commons Attribution License CC-BY. This checklist can be completed online using <https://www.goodreports.org/>, a tool made by the [EQUATOR Network](#) in collaboration with [Penelope.ai](#)*

For peer review only

# BMJ Open

## Magnitude and determinants of road traffic accidents in Mekelle city, Tigray, Northern Ethiopia: A cross sectional study

|                                 |                                                                                                                                                                                                  |
|---------------------------------|--------------------------------------------------------------------------------------------------------------------------------------------------------------------------------------------------|
| Journal:                        | <i>BMJ Open</i>                                                                                                                                                                                  |
| Manuscript ID                   | bmjopen-2019-034133.R1                                                                                                                                                                           |
| Article Type:                   | Original research                                                                                                                                                                                |
| Date Submitted by the Author:   | 09-Dec-2019                                                                                                                                                                                      |
| Complete List of Authors:       | Woldu, Awtachew; Mekelle University College of Health Sciences Desta, Abraham; Tigray Health Research Institute, Public Health Research Woldearegay , Tewolde ; Tigray Health Research Institute |
| <b>Primary Subject Heading</b>: | Occupational and environmental medicine                                                                                                                                                          |
| Secondary Subject Heading:      | Public health, Health policy                                                                                                                                                                     |
| Keywords:                       | Road Traffic Accident, Drivers, Mekelle city, Tigray, Ethiopia                                                                                                                                   |
|                                 |                                                                                                                                                                                                  |

SCHOLARONE™  
Manuscripts



I, the Submitting Author has the right to grant and does grant on behalf of all authors of the Work (as defined in the below author licence), an exclusive licence and/or a non-exclusive licence for contributions from authors who are: i) UK Crown employees; ii) where BMJ has agreed a CC-BY licence shall apply, and/or iii) in accordance with the terms applicable for US Federal Government officers or employees acting as part of their official duties; on a worldwide, perpetual, irrevocable, royalty-free basis to BMJ Publishing Group Ltd ("BMJ") its licensees and where the relevant Journal is co-owned by BMJ to the co-owners of the Journal, to publish the Work in this journal and any other BMJ products and to exploit all rights, as set out in our [licence](#).

The Submitting Author accepts and understands that any supply made under these terms is made by BMJ to the Submitting Author unless you are acting as an employee on behalf of your employer or a postgraduate student of an affiliated institution which is paying any applicable article publishing charge ("APC") for Open Access articles. Where the Submitting Author wishes to make the Work available on an Open Access basis (and intends to pay the relevant APC), the terms of reuse of such Open Access shall be governed by a Creative Commons licence – details of these licences and which [Creative Commons](#) licence will apply to this Work are set out in our licence referred to above.

Other than as permitted in any relevant BMJ Author's Self Archiving Policies, I confirm this Work has not been accepted for publication elsewhere, is not being considered for publication elsewhere and does not duplicate material already published. I confirm all authors consent to publication of this Work and authorise the granting of this licence.

1  
2  
3 **1 Magnitude and determinants of road traffic accidents in Mekelle city, Tigray,**  
4  
5  
6 **2 Northern Ethiopia: A cross sectional study**  
7  
8  
9  
10  
11  
12

13 5 Awtachew Berhe Woldu [MSc.]<sup>1</sup>, Abraham Aregay Desta [MSc.]<sup>2\*</sup>, Tewelde Wubayehu

14  
15 6 Woldearegay [MD, MSc.]<sup>2</sup>  
16  
17  
18  
19  
20  
21  
22

23 9 <sup>1</sup> Department of Biostatistics, School of Public Health, Mekelle University, Mekelle, Tigray  
24  
25 10 Region, Ethiopia, e-mail: [awtachewb@gmail.com](mailto:awtachewb@gmail.com), Cell phone: +251925450934  
26  
27  
28

29 12 <sup>2</sup> Department of Public Health Research, Public Health Research and Emergency Management  
30  
31 13 Directorate, Tigray Health Research Institute, Mekelle, Tigray Region, Ethiopia, e-mail:  
32  
33 14 [abaregaydesta@gmail.com](mailto:abaregaydesta@gmail.com), cell phone: +251923454554, P. O. Box: 1547  
34  
35  
36  
37  
38  
39  
40

41 17 <sup>2</sup> Tigray Health Research Institute, Mekelle, Tigray Region, Ethiopia, e-mail:  
42  
43 18 [tewuba@yahoo.com](mailto:tewuba@yahoo.com), cell phone: +251907363636, P. O. Box: 1547  
44  
45  
46  
47  
48  
49  
50  
51  
52  
53  
54  
55  
56  
57  
58  
59  
60

20 \*Corresponding author: Abraham Aregay Desta (AD)

## 24 **Abstract**

25 **Objective:** This study aimed to assess the magnitude and determinants of Road Traffic Accidents  
26 (RTAs) in Mekelle City, Northern Ethiopia.

27 **Methods:** A cross-sectional study was done using a simple random sampling technique.

28 **Setting:** The study was done in Mekelle city from Feb to Jun 2015.

29 **Participants:** The study was done among drivers settled in Mekelle city.

30 **Main outcome measures:** The main outcome measure was occurrence of Road Traffic Accident  
31 within two years. A binary logistic regression was used to identify factors associated with RTA.

32 **Results:** The magnitude of RTA was found to be 23.17%. According to the drivers' perceived  
33 cause of the accident, 22 (38.60%) of the accident was due to violation of traffic rules and  
34 regulations. The majority of the victims were pedestrians, 19 (33.33%). Drivers who were driving  
35 a governmental vehicle were 4.16 (AOR=4.16; 95% CI: 1.48- 11.70) times more likely to have  
36 RTA compared to those who drive private vehicles. Drivers who used alcohol were 2.29  
37 (AOR=2.29; 95% CI: 1.08-4.85) times more likely to have RTA compared to those drivers who  
38 did not consume alcohol.

39 **Conclusion:** Magnitude of RTA was high. Driving a governmental vehicle and alcohol use during  
40 driving were the factors associated with RTA. Monitoring blood alcohol level of drivers should be  
41 in place. Holistic study should be done to identify the causes of RTAs.

## 42 **Keywords**

43 Road Traffic Accident; Drivers; Mekelle city; Tigray; Ethiopia

## 44 **Strength and Limitation**

- 45 ➤ Data quality was assured under close supervision of the principal investigators.
- 46 ➤ Appropriate statistical methods were used to present the findings of the study.
- 47 ➤ Cross sectional study design does not allow establishing causality.
- 48 ➤ The analysis of this study misses some important variables like quality of the vehicles  
49 and road safety.
- 50 ➤ There may be recall bias on the RTA occurrences.

## 51 **1. Introduction**

52 Road Traffic Accident (RTA) is an accident which occurs or originates on a way or street open to  
53 public traffic; resulting in one or more persons being killed or injured, and at least one moving  
54 vehicle is involved. RTA includes collisions between vehicles, vehicles and pedestrians and  
55 vehicles and animals or fixed obstacles [1]. RTA contributes to poverty by causing loss of  
56 productivity, material damage, injuries, disabilities, grief and deaths [2]. Deaths and injuries  
57 resulting from road traffic crashes remain a serious problem globally and current trends suggest  
58 that this will continue to be the case in the foreseeable future [3, 4].

59 Approximately 1.3 million people die each year in traffic-related accidents worldwide [5]. Road  
60 traffic injury is now the leading cause of death for children and young adults aged 5–29 years,  
61 signaling a need for a shift in the current child health agenda. It is the eighth leading cause of death  
62 for all age groups exceeding HIV/AIDS, tuberculosis and diarrheal diseases [6] and the deaths due  
63 to RTAs are predicted to become the 5th leading cause of death by the year 2020 [5].

1  
2  
3 64 The burden of road traffic injuries and deaths is disproportionately borne by vulnerable road users  
4  
5 65 and those living in low- and middle-income countries, where the growing number of deaths is  
6  
7 66 fuelled by transport that is increasingly motorized. Between 2013 and 2016, no reductions in the  
8  
9 67 number of road traffic deaths were observed in any low-income country [2]. Although road  
10  
11 68 infrastructures have a significant role in the occurrence of RTA, the human factor is the most  
12  
13 69 prevalent contributing factor of RTAs. This includes both driving behavior (e.g., drinking and  
14  
15 70 driving, speeding, traffic law violations) and impaired skills (e.g. lack of attention, exhaustion,  
16  
17 71 physical disabilities and so on) [7]. The United Nations (UN) has planned on achieving Sustainable  
18  
19 72 Development Goal (SDG) target 3.6 calls for a reduction in the number of deaths by half by 2020  
20  
21 73 [8].  
22  
23  
24  
25  
26

27 74 Poor conditions of quality of vehicles and less road safety are determinant factors for RTA in  
28  
29 75 Africa [9] including Ethiopia [10]. World Health Organization (WHO) in 2011 reported that RTA  
30  
31 76 in Ethiopia reached 22,786 which accounted for 2.77% of all the deaths. The report showed that  
32  
33 77 RTA is the 9<sup>th</sup> killer health problem in the country. Road traffic accident makes Ethiopia 12<sup>th</sup> and  
34  
35 78 9<sup>th</sup> in the world and in Africa respectively [11]. Mekelle is a fast growing regional city, which has  
36  
37 79 a heavy traffic flow, especially during peak hours [12]. In Mekelle city, it was reported that road  
38  
39 80 traffic accidents is increasing from year to year and it was shown that 96% of the causes were  
40  
41 81 related to human risky behavior whereas 4% was due to vehicle related factors [13]. However,  
42  
43 82 despite the growing magnitude of RTAs in the city, there is paucity of data on determinants of  
44  
45 83 RTAs among drivers. Hence, this study was conducted to assess the magnitude and determinants  
46  
47 84 of RTAs among drivers in Mekelle city, Tigray, Ethiopia. This study will have a significant role  
48  
49 85 in supplementing and informing the current status in achieving the SDG 3.6 UN target.  
50  
51  
52  
53  
54  
55  
56  
57  
58  
59  
60

## 86 2. Methods

### 87 Study setting

88 The study was conducted among drivers in Mekelle city, Tigray, northern Ethiopia from Feb to  
89 Jun 2015. Mekelle is the capital city of the Tigray regional state which is found at 783 Km north  
90 of the capital city of Ethiopia, Addis Ababa. Regarding road infrastructure: Mekelle city has 55  
91 km asphalted, 23 km cobble stone and 152 km gravel road [14].

### 92 Study design

93 A cross-sectional study design was used.

### 94 Participants

95 All drivers who were based in Mekelle city with a legal driving license and who were driving taxi,  
96 Bajaj (three wheel taxi), private owned car and governmental car in Mekelle city were included in  
97 the study. Heavy truck drivers, drivers who were not working and sick during the study period,  
98 those who drive more than two vehicle types and those who came from other areas to Mekelle city  
99 were excluded from the study.

100 The sample size was calculated from a previous study, where the prevalence of road traffic accident  
101 was reported,  $p=22\%$  in Mekelle city [13]. Using 5% marginal error and 95% confidence interval  
102 by the following formula:

$$103 n = (Z_{\alpha/2})^2 P (P-1)/D^2$$

104 Where  $n$  = Minimum sample size required

105  $Z$  = Standard score corresponding to 95% confidence interval

106  $P$  = Assumed proportion of drivers

107  $D$  = Margin of error (precision) 5%

$$108 n = 3.84 \times 0.1716/0.0025 = 263$$



1  
2  
3 109 Since the source population was less than 10,000(i.e. 1500), sample size correction formula was  
4  
5 110 used:

$$n_f = n / (1 + (n/N))$$

Where  $n_f$  = desired sample size

$n$  = calculated sample size

$N$  = total population

$$n_f = n / (1 + (n/N)) = 263 / (1 + (263/1500)) = 263 / 1.175 = 223.8 \sim 224$$

By adding 10% contingency for non-response, the sample size was  $224 + 22 = 246$

### 117 **Sampling procedures**

118 A sampling frame was constructed by a vehicle plate number, which was obtained from Mekelle  
119 city transport office. The frame was sub categorized based on the type of the vehicle as a taxi,  
120 Bajaj, governmental vehicles, and private/house vehicles. Sub samples were calculated for each  
121 category of vehicles proportional to the number of vehicles in the respective categories. Then,  
122 study subjects were selected using simple random sampling method (see Figure 1).

### 123 **Data collection procedures and tools**

124 The study subjects (drivers) were traced and interviewed for data collection. The drivers were  
125 traced at their destination for taxi and Bajaj, house cars in their working area and governmental  
126 cars at their offices using the car plate number. A structured interviewer administered  
127 questionnaire, adapted from different literatures, was used. The questionnaire was initially  
128 prepared in English and was translated into the local language Tigrigna. The instrument included:  
129 socio-demographic characteristics of drivers, risky behaviors factors and other variables which has  
130 a bearing on RTA. Trained data collectors and supervisors handled the data collection process.

### 131 **Patient and Public Involvement**

132 Drivers in Mekelle city were involved in the study.

### 133 **Data Quality Control**

134 Pre-test was done on 5% of the sample at Adigrat town, Tigray region. Based on the pretest  
135 findings, necessary corrections were made to the questionnaire. Adequate supervision was  
136 undertaken by the supervisors and principal investigator during the data collection. Daily spot-  
137 checking of the filled questionnaires for errors or any incompleteness was done by the supervisors  
138 and the principal investigator.

### 139 **Data management and analysis**

140 The collected data were entered and cleaned in Microsoft excel 2007. Then, the data were exported  
141 and analyzed using STATA version 12. Values of categorical variables were presented as  
142 frequencies and percentages. All statistical tests were performed at the 5% significance level.

143 The dependent variable was a Road Traffic Accident (RTA) which was dichotomized into Yes  
144 (labeled “1”) and No (labeled “0”). Each independent variable was cross tabulated with the  
145 outcome variable and variables which showed significant association were further entered into the  
146 bivariate binary logistic regression. Finally, variables significant in the bivariate analysis were  
147 entered into multivariable binary logistic regression analysis to identify determinants of RTA. The  
148 final model was developed using a step-wise logistic regression.

149 The confounding effect of the explanatory variables was checked using forward and backward  
150 elimination techniques and any variable above 20% change of coefficient was considered as a  
151 confounder. Multi-collinearity was checked using Variance Inflation Factor (VIF) at a cutoff value  
152 of 10. Variables with greater than 10 VIF value were handled by removing the most inter-

1  
2  
3 153 correlated variable(s) from the model and substitute their cross product as an interaction term.  
4  
5 154 Final model fitness was checked using the Hosmer-Lemshew method. Receiver Operating  
6  
7  
8 155 Characteristic (ROC) curve was used to show how much the independent variables in the final  
9  
10 156 model predicted the dependent variable.  
11  
12  
13

### 14 157 **3. Results**

#### 158 **Socio-demographic characteristics of the respondents**

19  
20 159 The response rate was 100%. The median (IQR) age of the respondents was 30 (10) years. The  
21  
22 160 majority of study participants (98.37%) were males. Regarding the marital status of the  
23  
24 161 respondents, 102 (41.46%), 101(41.06%), 30 (12.20%) and 13 (5.28%) were divorced, married,  
25  
26 162 single and widower respectively. The majority of the drivers, 170 (69.11%) were Christian  
27  
28  
29 163 Orthodox, followed by Muslims, 54 (21.95%). With regard to their educational status, 225  
30  
31 164 (91.46%) had attained at least grade 5. The median (IQR) monthly income (in Birr) of the study  
32  
33 165 participants was 1000 (1200) (Table 1).  
34  
35  
36 166  
37  
38 167  
39  
40 168  
41  
42  
43 169  
44  
45 170  
46  
47 171  
48  
49 172  
50  
51 173  
52  
53  
54 174  
55  
56  
57  
58  
59  
60

175 Table 1: Socio-demographic and economic characteristics of drivers in Mekelle city, Northern  
 176 Ethiopia, 2015. (n=246)

| Variables                              | Frequency   | Percentage |
|----------------------------------------|-------------|------------|
| Age in years, median (IQR)*            | 30 (10)     |            |
| Monthly income in Birr, median (IQR)   | 1000 (1200) |            |
| Sex                                    |             |            |
| Male                                   | 242         | 98.37      |
| Female                                 | 4           | 1.63       |
| Marital status                         |             |            |
| Married                                | 101         | 41.06      |
| Single                                 | 30          | 12.20      |
| Divorced                               | 102         | 41.46      |
| Widowed                                | 13          | 5.28       |
| Religion                               |             |            |
| Orthodox                               | 170         | 69.11      |
| Muslim                                 | 54          | 21.95      |
| Protestant                             | 8           | 3.25       |
| Catholic                               | 14          | 5.69       |
| Educational status                     |             |            |
| Illiterate                             | 17          | 6.91       |
| Primary (Grade 1-4)                    | 4           | 1.63       |
| Secondary (Grade 5-10)                 | 121         | 49.19      |
| Preparatory & above (Grade 11 & above) | 104         | 42.28      |
| Ethnicity                              |             |            |
| Tigraway/ti                            | 222         | 90.24      |
| Amhara                                 | 17          | 6.91       |
| Afar                                   | 7           | 2.85       |

177 \* IQR: Inter Quartile Range

### 178 **Magnitude of RTAs**

179 Among all the drivers, 57 (23.17%) had encountered road traffic accident in the past two years  
 180 from the time of the current study. Most of the accidents happened on Monday, 22 (38.60%) and  
 181 Friday, 13 (22.81%) even though accidents were reported in all the seven days. The causes of the  
 182 accidents, as reported by the drivers, were mainly due to violation of traffic law in 22/57 ((38.60%)  
 183 of the cases. A significant number of the accidents, 25/57 (43.86%) happened at dawn. Pedestrians  
 184 and Cyclists constituted the major share of the RTA victims, 31/57 (54.40%). About two third of  
 185 the accidents, 43/57 (75.44%) happened at either T-junction road or cross road (Table 2).

186 Table 2: Characteristics and Setting of RTA in Mekelle City, Northern Ethiopia. 2015. (n=246)

| Variables                                   | Frequency                  | Percentage |
|---------------------------------------------|----------------------------|------------|
| Accident experience in the previous 2 years | Yes                        | 57         |
|                                             | No                         | 189        |
| Type of accident                            | Injury                     | 29         |
|                                             | Injury and Property damage | 14         |
|                                             | Property damage            | 8          |
|                                             | Death                      | 6          |
| Light Condition                             | At dawn                    | 41         |
|                                             | Day time                   | 16         |
| Victim                                      | Pedestrian                 | 19         |
|                                             | Cyclist                    | 12         |
|                                             | Passenger                  | 14         |
|                                             | Driver                     | 12         |
| Accident site road                          | T-junction                 | 15         |
|                                             | Cross Road                 | 28         |
|                                             | Straight road              | 14         |
| Day of accident                             | Monday                     | 22         |
|                                             | Tuesday                    | 4          |

|                                            |                                                 |    |       |
|--------------------------------------------|-------------------------------------------------|----|-------|
|                                            | Wednesday                                       | 6  | 10.53 |
|                                            | Thursday                                        | 3  | 5.26  |
|                                            | Friday                                          | 13 | 22.81 |
|                                            | Saturday                                        | 9  | 15.79 |
| Number of accidents (life time experience) | 1                                               | 42 | 73.68 |
|                                            | 2                                               | 12 | 21.05 |
|                                            | 3                                               | 3  | 5.26  |
| Reason for the accident                    | Lack of general safety awareness of pedestrians | 10 | 18.52 |
|                                            | Violation of traffic rules and regulations      | 22 | 40.98 |
|                                            | Violation of speed Limit                        | 9  | 15.73 |
|                                            | Lack of vehicle maintenance                     | 13 | 24.77 |

187

### 188 Risky driving behaviors

189 Concerning risky driving behaviors, 92 (37.40) of the drivers drunk alcohol before driving. About  
 190 43 (17.48%) of the drivers were chat chewers and 30 (12.20%) were smokers. More than one third  
 191 of the drivers, 96 (39.02%) ever reported that they used cell phone for communication while  
 192 driving. The prevalence of RTA among drivers was 3.29%, 32.6%, 36.7%, 18.5% and 21.6%  
 193 among cell phone users, alcohol consumers, chat chewers, cigarette smokers and seat belt users  
 194 while driving respectively. However, the prevalence of RTA among the drivers who do not use  
 195 cell phone and seat belt were 17.33% and 30.9% respectively (Table 3).

196

197

198

199 Table 3: Risky driving behaviors among drivers in Mekelle city, Northern Ethiopia, 2015. (n=246)

| Variables                                          |                           | RTA          |             | Frequency | Percentage | P-Value |
|----------------------------------------------------|---------------------------|--------------|-------------|-----------|------------|---------|
|                                                    |                           | Yes<br>n (%) | No<br>n (%) |           |            |         |
| Cell phone use while driving                       | Yes                       | 31(32.29)    | 65(67.71)   | 96        | 39.02      | 0.007   |
|                                                    | No                        | 26(17.33)    | 124(82.67)  | 150       | 60.98      |         |
| Substance use                                      | Alcohol                   | 14(32.6)     | 29(67.4)    | 92        | 37.40      | 0.026   |
|                                                    | Chat                      | 11(36.7)     | 19(63.3)    | 43        | 17.48      |         |
|                                                    | Cigarette                 | 32(18.5)     | 141(81.5)   | 30        | 12.20      |         |
| Seat belt use                                      | Yes                       | 44(21.6)     | 160(78.4)   | 204       | 82.93      | 0.189   |
|                                                    | No                        | 13(30.9)     | 29(69.0)    | 42        | 17.07      |         |
| What do you do when another vehicle tries to pass? | I advise him to slow down | 4(12.5)      | 28(87.5)    | 32        | 13.01      | 0.028   |
|                                                    | I give him priority       | 42(29.2)     | 102(70.8)   | 144       | 58.54      |         |
|                                                    | I speed up                | 11(15.71)    | 59(84.29)   | 70        | 28.46      |         |
| A measure taken when there is heavy traffic        | Pass accordingly          | 49(21.59)    | 178(78.41)  | 3         | 1.22       | 0.069   |
|                                                    | Speed up                  | 6(37.50)     | 10(62.50)   | 16        | 6.50       |         |
|                                                    | Slow down                 | 2(66.67)     | 1(33.33)    | 227       | 92.28      |         |
| Road Type                                          | Gravel                    | 5(16.7)      | 25(83.3)    | 30        | 12.2       | 0.117   |
|                                                    | Asphalt                   | 39(28.1)     | 100(71.9)   | 77        | 31.3       |         |
|                                                    | Cobble stone              | 13(16.9)     | 64(83.1)    | 139       | 56.5       |         |

200 **Factors associated with Road Traffic Accidents**

201 In the bivariate analysis age, being married, being single, driving governmental vehicle, alcohol  
 202 use, other substances other than alcohol use, cell phone use during driving, drivers' years of  
 203 experience and vehicle service were significantly associated with RTAs at 95% CI.

204 Multivariable binary logistic regression analysis showed that drivers who drove after consuming  
 205 alcohol were 2.29 (AOR=2. 29; 95% CI: 1.08-4.85) times more likely to have RTA compared to  
 206 drivers who did not consume alcohol. Drivers who drove governmental vehicles were  
 207 4.16 (AOR=4. 16; 95% CI: 1.48- 11.70) times more likely to have RTA compared to drivers of  
 208 privately owned vehicles. As the driver's experience increased by one year, the probability of RTA  
 209 decreased by 26% (AOR=0. 74; 95% CI: 0.60-0.90) (Table 4).

210 Table 4: Multivariable regression analysis of RTA in Mekelle city, Northern Ethiopia, 2015.  
 211 (n=246)

| Variables         |                              | COR(95% CI)          | AOR(95% CI)        |
|-------------------|------------------------------|----------------------|--------------------|
| Age               |                              | 0.08(0.041, 0.121)*  | 1.05(0.98, 1.12)   |
| Marital status    | Married                      | 0.85(0.348, 2.086)*  | 1.62(0.60, 4.39)   |
|                   | Single                       | 0.37 (0.141, 0.972)* | 0.94(0.25, 3.45)   |
|                   | Divorced                     | 1(Ref.)              | 1(Ref.)            |
|                   | Widower                      | 2.72(0.711, 10.408)  |                    |
| Religion          | Protestant                   | 1(Ref.)              | 1(Ref.)            |
|                   | Orthodox                     | 0.22( 0.052, 0.940)* | 0.24(0.05, 1.26)   |
|                   | Muslim                       | 0.45( 0.102, 2.059)  |                    |
|                   | Catholic                     | 0.55( 0.095, 3.245)  |                    |
| Ethnicity         | Afar                         | 1(Ref.)              | 1(Ref.)            |
|                   | Amhara                       | 0.12(0.011, 1.195)   |                    |
|                   | Tigray/ti                    | 0.04( 0.004, 0.351)* | 0.04(0.005, 0.58)* |
| Vehicle ownership | Private (Driver is employee) | 1(Ref.)              | 1(Ref.)            |



|                                                   |                              |                       |                     |
|---------------------------------------------------|------------------------------|-----------------------|---------------------|
|                                                   | Governmental                 | 3.5( 1.464, 8.168)*   | 4.16( 1.48, 11.70)* |
|                                                   | Driver (Driver is the owner) | 2.38( 1.225, 4.660)*  | 1.64(0.71, 3.339)   |
| License grade                                     | 1 <sup>st</sup>              | 1(Ref.)               |                     |
|                                                   | 3 <sup>rd</sup>              | 1.36(0.329, 5.632)    |                     |
|                                                   | 4 <sup>th</sup>              | 0.55(0.138, 2.241)    |                     |
|                                                   | Special                      | 1.52(0.249, 9.294)    |                     |
| Alcohol use                                       | No                           | 1(Ref.)               | 1(Ref.)             |
|                                                   | Yes                          | 1.88(1.034, 3.437)*   | 2.29(1.08, 4.85)*   |
| Substance use other than alcohol                  | Chat                         | 2.12.(1.010, 4.478)*  | 2.18(0.78, 6.05)    |
|                                                   | Cigarette                    | 2.55(1.105, 5.884)*   | 1.11(0.39, 3.18)    |
|                                                   | I do not use                 | 1(Ref.)               | 1(Ref.)             |
| Cell phone use while driving                      | No                           | 1(Ref.)               | 1(Ref.)             |
|                                                   | Yes                          | 2.27(1.246, 4.150)*   | 1.80(0.86, 3.74)    |
| What do you do when another vehicle tries to pass | I advise him to slow down    | 1(Ref.)               |                     |
|                                                   | I give him priority          | 2.88(0.952, 8.724)    |                     |
|                                                   | I speed up                   | 1.3(0.38, 4.463)      |                     |
| Income                                            |                              | 1.00(0.999, 1.000)    |                     |
| Distance travelled                                |                              | 1.00(0.999, 1.005)    |                     |
| Driver's experience                               |                              | 0.86 (0. 749, 0.999)* | 0.74(0.60, 0.90)*   |
| Vehicle service                                   |                              | 1.24(1.103, 1.398)*   | 1.18(0.99, 1.40)    |

212 \*P-value less than 0.05

1  
2  
3 213 The residuals were checked for influential outlier observations and the result showed that there  
4  
5 214 were no suspicious influential outlier observations. Hosmer and Lemeshow test showed a chi-  
6  
7  
8 215 square value of 9.41 ( $p=0.3085$ ) which is greater than 0.05. The null hypothesis is not to be  
9  
10 216 rejected, which implies that the model estimates adequately to fit the data at an acceptable  
11  
12 217 level. The area under ROC curve was 0.7536 (See figure 2). The predicting power of the  
13  
14 218 independent variables for the dependent variable was 75.36%. Therefore, it can be concluded that  
15  
16 219 the model fits the data reasonably well. No confounding factor was found.  
17  
18  
19

## 20 220 **4. Discussion**

21  
22  
23  
24 221 The main aim of the study was to assess the magnitude and determinants of road traffic accidents  
25  
26 222 among drivers in Mekelle city, Tigray, Northern Ethiopia. The study revealed that the magnitude  
27  
28 223 of self-reported RTA in Mekelle city was 23.17%. There was a slight increment of accidents in  
29  
30 224 this study compared to the previous study done in Mekelle city, which showed that the prevalence  
31  
32 225 of RTA was 22% [12]. However, it is lower when compared with a similar study conducted in the  
33  
34 226 same city among taxi drivers with 4 wheels, of which 26.4% of them reported RTA encounter  
35  
36 227 within the past 3 years [15]. This variation might be due to the fact that the city is expanding where  
37  
38 228 the population size is increasing. Or it might be due to the differences in the RTAs report period  
39  
40 229 where the current study included reports of RTA in the past 2 years from the time of the study.  
41  
42  
43  
44  
45

46 230 The study identified that ownership of the vehicles was found to be predictor of RTA. Road traffic  
47  
48 231 accident was 3.78 times more likely among those who drove governmental vehicles. Though  
49  
50 232 literatures did not show supportive or contradicting idea for this finding, this might be due to the  
51  
52 233 fact that governmental drivers might violate the traffic rules and speed up to arrive timely at  
53  
54 234 workplace especially at the peak hours.  
55  
56  
57  
58  
59  
60

1  
2  
3 235 This study revealed that driving after taking alcohol was found to be an aggravating factor for  
4  
5 236 RTA. Drivers who drove after consuming alcohol were 2.29 more likely to have RTA compared  
6  
7  
8 237 to those who don't consume alcohol. This finding is similar to a similar study which showed that  
9  
10 238 individuals who drank alcohol were 3.2 times more likely to encounter RTA [16]. It was also  
11  
12 239 supported by the Great Britain department for Transport provisional estimates for 2013 which  
13  
14 240 showed that between 230 and 290 people were killed in accidents in Great Britain where at least  
15  
16 241 one driver was over the drink drive limit [17]. Another study also showed that impairments from  
17  
18 242 alcohol was associated with traffic accident of crashes and deaths [18, 19]. This might be due to  
19  
20 243 the nature of alcohol that has a range of psycho-motor and cognitive effects, including attitude,  
21  
22 244 judgment, vigilance, perception, reaction, and controlling [20]. This can increase accident risk by  
23  
24 245 lowering cognitive processing, coordination, attention, vision and hearing.  
25  
26  
27  
28

29 246 This study has also revealed that as driver's experience increases by one year, the probability of  
30  
31 247 getting RTA decreased by 26 percent. This finding was similar to the finding of a study in 2003  
32  
33 248 which showed that as the drive miles and experience increases, the probability of self-reported  
34  
35 249 crash decreased [21]. This might be due to the anticipation of potentially hazardous traffic  
36  
37 250 situations which require years of practice.  
38  
39  
40

41 251 The likelihood of RTA was 1.8 times higher among drivers who used cell phone while driving  
42  
43 252 compared to these who do not use. This study is consistent with a previously done study in Mekelle  
44  
45 253 city [15]. Other studies have also reported that drivers distracted by mobile devices such as  
46  
47 254 smartphones and/ or other in-vehicle devices are at risk for a serious negative outcomes [22- 24].  
48  
49  
50 255 A similar study indicated that telephone use while driving increases the likelihood of RTA/ crash  
51  
52 256 by a factor of four, while texting by around 23 times [25]. This is because of loss of attention to  
53  
54 257 surroundings while driving.  
55  
56  
57

1  
2  
3 258 The findings of this study showed visual impairment was not found to be a predictor variable for  
4  
5 259 RTA. But a study done in Ibadan town Nigeria showed that drivers who had visual impairment  
6  
7  
8 260 were 1.6 times more likely to encounter RTA [26]. Therefore, this needs further investigation.  
9

10  
11 261 The strength of this study is that data quality was assured under close supervision of the principal  
12  
13 262 investigators during both data entry and data collection time. Appropriate statistical methods were  
14  
15 263 used to present the findings of the study. Despite this strength, the study have certain limitations.  
16  
17 264 Due to cross-sectional study design nature, establishing causality is not possible. In addition to  
18  
19 265 that, there may be recall bias and the analysis of this study misses some important variables like  
20  
21 266 quality of the vehicles and road safety.  
22  
23

## 24 25 267 **Conclusion** 26 27

28  
29 268 The magnitude of RTA was high. Driving a governmental vehicle and alcohol consumption were  
30  
31 269 the factors associated with RTA. Monitoring blood alcohol level of drivers should be in place.  
32  
33 270 Holistic study should be done to identify the causes of RTA.  
34  
35

## 36 37 38 271 **5. Disclosure section** 39 40

### 41 272 **Acknowledgments** 42

43  
44 273 We are glad to extend our gratitude to the data collectors and participants of the study. We would like to  
45  
46 274 extend our gratitude to Mekelle University as well for funding the research.  
47  
48  
49  
50  
51  
52  
53  
54  
55  
56  
57

## 275 **Author contributions**

276 AW conceptualized and designed the study, involved in data analyses, acquisition of data,  
277 tabulating the data, interpretation of data, preparing tables and figures, and critically revising the  
278 manuscript. AD and TW have involved in interpretation of data, supervision, administration,  
279 drafting the initial manuscript, and critically revising the manuscript. AD have primary  
280 responsibility for final content and involved in final review. All authors read and approved the  
281 final manuscript.

## 282 **Disclosure statement**

283 No potential conflict of interest was reported by the authors.

## 284 **Ethics and consent**

285 Ethical clearance and approval was given by Mekelle University, school of public health Ethical  
286 Review Committee with the approval number of ERC 0017/2014. Written consent was taken  
287 from each participant during the interview. All authors read and approved the final manuscript.

## 288 **Data availability**

289 The data set of the study findings are available from the corresponding author upon reasonable  
290 request.

## 291 **Funding**

292 This study was funded by Mekelle University for research and community services.

## 293 **6. References**

- 294 1. Organization for Economic Cooperation and Development (OECD). Health Statistics 2019  
295 Definitions, Sources and Methods. [Internet]. Paris: OECD; 2019 [cited 2019 Nov 24].

- 1  
2  
3 296 Available from:  
4  
5 297 file:///C:/Users/lenovo/Downloads/HEALTH\_STAT\_11\_Injuries%20in%20road%20traff  
6  
7 ic%20accidents.pdf  
8 298  
9  
10 299 2. World Health Organization (WHO). Global status report on road safety. Geneva: WHO;  
11  
12 300 2018.  
13  
14 301 3. WHO. Projections of mortality and causes of death, 2015 and 2030. [Internet]. Geneva:  
15  
16 WHO; 2013 [cited 2019 Oct 29]. Available from: <http://www.who.int/healthinfo/>  
17 302  
18  
19 303 4. Foreman KJ, Marquez N, Dolgert A, Fukutaki K, Mcgaughey M, Pletcher MA, et al.  
20  
21 304 Forecasting life expectancy , years of life lost , all-cause and cause-specific mortality for  
22  
23 305 250 causes of death: reference and alternative scenarios 2016–2040 for 195 countries and  
24  
25 306 territories. *Lancet*. 2018; 392:2052–90.  
26  
27  
28 307 5. WHO. Global Plan: Decade of Action for Road Safety 2011-2020. Geneva: WHO; 2010  
29  
30  
31 308 6. WHO. Global Health Expenditure Database [Internet]. Geneva: WHO; 2018 [cited 2019  
32  
33 309 Nov 15]. Available from: <http://apps.who.int/nha/database>  
34  
35 310 7. Nabi H, Consoli SM , Chastang JF, Chiron M, Lafont S, Lagarde E. Type A Behavior  
36  
37 311 Pattern, Risky Driving Behaviors, and Serious Road Traffic Accidents: A Prospective  
38  
39 312 Study of the GAZEL Cohort. *American Journal of Epidemiology*. 2005;161(9).  
40  
41  
42 313 8. WHO. World health rankings. Live longer live better. Geneva: WHO; 2011.  
43  
44  
45 314 9. Abuhamoud MA, Rahmat RA, Ismail A. Transportation and its Concerns in Africa: A  
46  
47 315 Review. *The Social Science*. 2011; 6: 51-63. Available from DOI:  
48  
49 316 10.3923/sscience.2011.51.63  
50  
51 317 10. WHO. World health rankings. Live longer live better. Geneva: WHO; 2013.  
52  
53  
54  
55  
56  
57  
58  
59  
60

- 1  
2  
3 318 11. United Nations. TRANSFORMING OUR WORLD: THE 2030 AGENDA FOR  
4  
5 319 SUSTAINABLE DEVELOPMENT. New York: United Nations; 2015.  
6  
7  
8 320 12. Hassan A, Godesso A, Abebe L, Girma E. Risky driving behaviors for road traffic accident  
9  
10 321 among drivers in Mekele city, Northern Ethiopia. BMC Research Notes. 2011; 4:535  
11  
12 322 13. Mekelle Town Police Commission Office. Report on road traffic accident Mekele.  
13  
14 323 Mekelle: Police commission; 2014.  
15  
16  
17 324 14. Mekelle City Administration. Free traffic ranks. [Internet]. Mekelle: Mekelle City  
18  
19 325 administration; 2019 [Cited 2019 Nov 13]. Available from:  
20  
21 326 <http://mekelleadministration.gov.et.rankank.com>  
22  
23  
24 327 15. Asefa NG, Ingale L, Shumey A, Yang H. Prevalence and Factors Associated with Road  
25  
26 328 Traffic Crash among Taxi Drivers in Mekelle Town, Northern Ethiopia, 2014: A Cross  
27  
28 329 Sectional Study. PLoS ONE. 2015; 10(3): e0118675.  
29  
30  
31 330 16. Connor J, Norton R, Ameratunga S, Jackson R. The contribution of alcohol to serious car  
32  
33 331 crash injuries. Epidemiology. 2004 May; 15(3):337-44.  
34  
35  
36 332 17. Great Britain Department for Transport. Estimates for reported road traffic accidents  
37  
38 333 involving illegal alcohol levels: 2013 (second provisional) Self-reported drink and drug  
39  
40 334 driving for 2013/14. Statistical release. [Internet]. London: Great Britain Department for  
41  
42 335 Transport; 2015 [Cited 2019 May 13]. Available from:  
43  
44 336 [https://assets.publishing.service.gov.uk/government/uploads/system/uploads/attachment\\_](https://assets.publishing.service.gov.uk/government/uploads/system/uploads/attachment_data/file/402698/rrcgb-drink-drive-2013-prov.pdf)  
45  
46 337 [data/file/402698/rrcgb-drink-drive-2013-prov.pdf](https://assets.publishing.service.gov.uk/government/uploads/system/uploads/attachment_data/file/402698/rrcgb-drink-drive-2013-prov.pdf)  
47  
48  
49 338 18. Shinar D. Traffic Safety and Human Behavior. 2nd edition. Ben Gurion University of the  
50  
51 339 Negev: Beersheba, Israel; 2017.  
52  
53  
54  
55  
56  
57  
58  
59  
60

- 1  
2  
3 340 19. Brown T, Milavetz G, Murry DJ. Alcohol, drugs and driving: implications for evaluating  
4  
5 341 driver impairment. *Ann Adv Automot Med Assoc Adv Automot Med*. 2013;57:23–32.  
6  
7  
8 342 20. Zhao X, Zhang X, Rong J. Study of the Effects of Alcohol on Drivers and Driving  
9  
10 343 Performance on Straight Road. [Internet]. Hindawi Publishing Corporation Mathematical  
11  
12 344 Problems in Engineering. 2014; Article ID 607652, 9 pages. [Cited 2019 Jun 13]. Available  
13  
14 345 from: <http://dx.doi.org/10.1155/2014/607652>  
15  
16  
17 346 21. Rolison JJ, Regev S, Moutari S, Feeney A. What are the factors that contribute to road  
18  
19 347 accidents? An assessment of law enforcement views, ordinary drivers' opinions, and road  
20  
21 348 accident records. *Accident Analysis & Prevention*. 2018; 115: 11-24  
22  
23  
24 349 22. Lipovac K, Đerić M, Tešić M, Andrić Z, Marić B. Mobile phone use while driving literary  
25  
26 350 review. *Transp Res Part F Traffic Psychol Behav*. 2017;47:132–42.  
27  
28  
29 351 23. Caird JK, Willness CR, Steel P, Scialfa C. A meta-analysis of the effects of cell phones on  
30  
31 352 driver performance. *Accid Anal Prev*. 2008 Jul;40(4):1282–93.  
32  
33 353 24. Horrey WJ, Wickens CD. Examining the impact of cell phone conversations on driving  
34  
35 354 using metaanalytic techniques. *Hum Factors*. 2006 Mar 6;48(1):196–205.  
36  
37  
38 355 25. Farmer CM, Braitman KA, Lund AK. Cell phone use while driving and attributable crash  
39  
40 356 risk. *Traffic Injury Prevention*. 2010 Oct; 11(5):466-70.  
41  
42 357 26. Bekibele CO, Fawole OI, Bamgboye AE, Adekunle LV, Ajav R, Baiyeroju AM. Risk  
43  
44 358 factors for road traffic accidents among drivers of public institutions in Ibadan, Nigeria.  
45  
46  
47 359 *African Journal Health Science*. 2007; 14:137-142.  
48  
49  
50  
51  
52  
53  
54  
55  
56  
57  
58  
59  
60



1  
2  
3  
4  
5  
6  
7  
8  
9  
10  
11  
12  
13  
14  
15  
16  
17  
18  
19  
20  
21  
22  
23  
24  
25  
26  
27  
28  
29  
30  
31  
32  
33  
34  
35  
36  
37  
38  
39  
40  
41  
42  
43  
44  
45  
46  
47  
48  
49  
50  
51  
52  
53  
54  
55  
56  
57  
58  
59  
60



Figure 1: Sampling Procedure. Schematic presentation of the sampling technique.

Fig 1

69x89mm (300 x 300 DPI)

1  
2  
3  
4  
5  
6  
7  
8  
9  
10  
11  
12  
13  
14  
15  
16  
17  
18  
19  
20  
21  
22  
23  
24  
25  
26  
27  
28  
29  
30  
31  
32  
33  
34  
35  
36  
37  
38  
39  
40  
41  
42  
43  
44  
45  
46  
47  
48  
49  
50  
51  
52  
53  
54  
55  
56  
57  
58  
59  
60

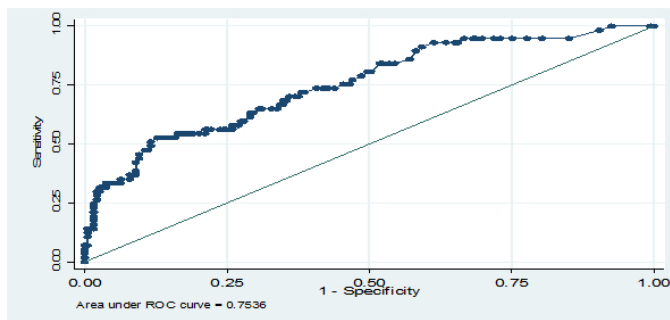

Figure 2: ROC curve. Predicting power of the independent variables for Road Traffic Accident.

Fig 2

69x89mm (300 x 300 DPI)

# Reporting checklist for cross sectional study.

Based on the STROBE cross sectional guidelines.

## Instructions to authors

Complete this checklist by entering the page numbers from your manuscript where readers will find each of the items listed below.

Your article may not currently address all the items on the checklist. Please modify your text to include the missing information. If you are certain that an item does not apply, please write "n/a" and provide a short explanation.

Upload your completed checklist as an extra file when you submit to a journal.

In your methods section, say that you used the STROBE cross sectional reporting guidelines, and cite them as:

von Elm E, Altman DG, Egger M, Pocock SJ, Gøtzsche PC, Vandenbroucke JP. The Strengthening the Reporting of Observational Studies in Epidemiology (STROBE) Statement: guidelines for reporting observational studies.

|                            | Reporting Item                                                                                                                                                                                                                                                                          | Page Number |
|----------------------------|-----------------------------------------------------------------------------------------------------------------------------------------------------------------------------------------------------------------------------------------------------------------------------------------|-------------|
| Title                      | <a href="#">#1a</a> Indicate the study's design with a commonly used term in the title or the abstract                                                                                                                                                                                  | 1           |
| Abstract                   | <a href="#">#1b</a> Provide in the abstract an informative and balanced summary of what was done and what was found                                                                                                                                                                     | 2           |
| Background / rationale     | <a href="#">#2</a> Explain the scientific background and rationale for the investigation being reported                                                                                                                                                                                 | 4           |
| Objectives                 | <a href="#">#3</a> State specific objectives, including any prespecified hypotheses                                                                                                                                                                                                     | 4           |
| Study design               | <a href="#">#4</a> Present key elements of study design early in the paper                                                                                                                                                                                                              | 5           |
| Setting                    | <a href="#">#5</a> Describe the setting, locations, and relevant dates, including periods of recruitment, exposure, follow-up, and data collection                                                                                                                                      | 5           |
| Eligibility criteria       | <a href="#">#6a</a> Give the eligibility criteria, and the sources and methods of selection of participants.                                                                                                                                                                            | 5           |
|                            | <a href="#">#7</a> Clearly define all outcomes, exposures, predictors, potential confounders, and effect modifiers. Give diagnostic criteria, if applicable                                                                                                                             | 7           |
| Data sources / measurement | <a href="#">#8</a> For each variable of interest give sources of data and details of methods of assessment (measurement). Describe comparability of assessment methods if there is more than one group. Give information separately for for exposed and unexposed groups if applicable. | 6           |

|    |                     |                      |                                                                                                                                                                                                                                                                            |                                                        |
|----|---------------------|----------------------|----------------------------------------------------------------------------------------------------------------------------------------------------------------------------------------------------------------------------------------------------------------------------|--------------------------------------------------------|
| 1  | Bias                | <a href="#">#9</a>   | Describe any efforts to address potential sources of bias                                                                                                                                                                                                                  | 6                                                      |
| 2  |                     |                      |                                                                                                                                                                                                                                                                            |                                                        |
| 3  | Study size          | <a href="#">#10</a>  | Explain how the study size was arrived at                                                                                                                                                                                                                                  | 6                                                      |
| 4  |                     |                      |                                                                                                                                                                                                                                                                            |                                                        |
| 5  | Quantitative        | <a href="#">#11</a>  | Explain how quantitative variables were handled in the analyses. If applicable,                                                                                                                                                                                            | 7                                                      |
| 6  | variables           |                      | describe which groupings were chosen, and why                                                                                                                                                                                                                              |                                                        |
| 7  |                     |                      |                                                                                                                                                                                                                                                                            |                                                        |
| 8  |                     |                      |                                                                                                                                                                                                                                                                            |                                                        |
| 9  | Statistical methods | <a href="#">#12a</a> | Describe all statistical methods, including those used to control for confounding                                                                                                                                                                                          | 7                                                      |
| 10 |                     |                      |                                                                                                                                                                                                                                                                            |                                                        |
| 11 |                     | <a href="#">#12b</a> | Describe any methods used to examine subgroups and interactions                                                                                                                                                                                                            | 7                                                      |
| 12 |                     |                      |                                                                                                                                                                                                                                                                            |                                                        |
| 13 |                     | <a href="#">#12c</a> | Explain how missing data were addressed                                                                                                                                                                                                                                    | N/A                                                    |
| 14 |                     |                      |                                                                                                                                                                                                                                                                            |                                                        |
| 15 |                     | <a href="#">#12d</a> | If applicable, describe analytical methods taking account of sampling strategy                                                                                                                                                                                             | N/A                                                    |
| 16 |                     |                      |                                                                                                                                                                                                                                                                            |                                                        |
| 17 |                     | <a href="#">#12e</a> | Describe any sensitivity analyses                                                                                                                                                                                                                                          | N/A                                                    |
| 18 |                     |                      |                                                                                                                                                                                                                                                                            |                                                        |
| 19 | Participants        | <a href="#">#13a</a> | Report numbers of individuals at each stage of study—eg numbers potentially eligible, examined for eligibility, confirmed eligible, included in the study, completing follow-up, and analysed. Give information separately for exposed and unexposed groups if applicable. | n/a there were no stages and study was not on patients |
| 20 |                     |                      |                                                                                                                                                                                                                                                                            |                                                        |
| 21 |                     | <a href="#">#13b</a> | Give reasons for non-participation at each stage                                                                                                                                                                                                                           | n/a                                                    |
| 22 |                     |                      |                                                                                                                                                                                                                                                                            |                                                        |
| 23 |                     | <a href="#">#13c</a> | Consider use of a flow diagram                                                                                                                                                                                                                                             | 6                                                      |
| 24 |                     |                      |                                                                                                                                                                                                                                                                            |                                                        |
| 25 | Descriptive data    | <a href="#">#14a</a> | Give characteristics of study participants (eg demographic, clinical, social) and information on exposures and potential confounders. Give information separately for exposed and unexposed groups if applicable.                                                          | 7                                                      |
| 26 |                     |                      |                                                                                                                                                                                                                                                                            |                                                        |
| 27 |                     | <a href="#">#14b</a> | Indicate number of participants with missing data for each variable of interest                                                                                                                                                                                            | N/A                                                    |
| 28 |                     |                      |                                                                                                                                                                                                                                                                            |                                                        |
| 29 | Outcome data        | <a href="#">#15</a>  | Report numbers of outcome events or summary measures. Give information separately for exposed and unexposed groups if applicable.                                                                                                                                          | 13                                                     |
| 30 |                     |                      |                                                                                                                                                                                                                                                                            |                                                        |
| 31 | Main results        | <a href="#">#16a</a> | Give unadjusted estimates and, if applicable, confounder-adjusted estimates and their precision (eg, 95% confidence interval). Make clear which confounders were adjusted for and why they were included                                                                   | 13                                                     |
| 32 |                     |                      |                                                                                                                                                                                                                                                                            |                                                        |
| 33 |                     | <a href="#">#16b</a> | Report category boundaries when continuous variables were categorized                                                                                                                                                                                                      | N/A                                                    |
| 34 |                     |                      |                                                                                                                                                                                                                                                                            |                                                        |
| 35 |                     | <a href="#">#16c</a> | If relevant, consider translating estimates of relative risk into absolute risk for a meaningful time period                                                                                                                                                               | n/a estimates were for odds ratio                      |
| 36 |                     |                      |                                                                                                                                                                                                                                                                            |                                                        |
| 37 | Other analyses      | <a href="#">#17</a>  | Report other analyses done—e.g., analyses of subgroups and interactions, and sensitivity analyses                                                                                                                                                                          | 13                                                     |
| 38 |                     |                      |                                                                                                                                                                                                                                                                            |                                                        |
| 39 |                     |                      |                                                                                                                                                                                                                                                                            |                                                        |
| 40 |                     |                      |                                                                                                                                                                                                                                                                            |                                                        |
| 41 |                     |                      |                                                                                                                                                                                                                                                                            |                                                        |
| 42 |                     |                      |                                                                                                                                                                                                                                                                            |                                                        |
| 43 |                     |                      |                                                                                                                                                                                                                                                                            |                                                        |
| 44 |                     |                      |                                                                                                                                                                                                                                                                            |                                                        |
| 45 |                     |                      |                                                                                                                                                                                                                                                                            |                                                        |
| 46 |                     |                      |                                                                                                                                                                                                                                                                            |                                                        |
| 47 |                     |                      |                                                                                                                                                                                                                                                                            |                                                        |
| 48 |                     |                      |                                                                                                                                                                                                                                                                            |                                                        |
| 49 |                     |                      |                                                                                                                                                                                                                                                                            |                                                        |
| 50 |                     |                      |                                                                                                                                                                                                                                                                            |                                                        |
| 51 |                     |                      |                                                                                                                                                                                                                                                                            |                                                        |
| 52 |                     |                      |                                                                                                                                                                                                                                                                            |                                                        |
| 53 |                     |                      |                                                                                                                                                                                                                                                                            |                                                        |
| 54 |                     |                      |                                                                                                                                                                                                                                                                            |                                                        |
| 55 |                     |                      |                                                                                                                                                                                                                                                                            |                                                        |
| 56 |                     |                      |                                                                                                                                                                                                                                                                            |                                                        |
| 57 |                     |                      |                                                                                                                                                                                                                                                                            |                                                        |
| 58 |                     |                      |                                                                                                                                                                                                                                                                            |                                                        |
| 59 |                     |                      |                                                                                                                                                                                                                                                                            |                                                        |
| 60 |                     |                      |                                                                                                                                                                                                                                                                            |                                                        |

|    |                  |                     |                                                                                          |       |
|----|------------------|---------------------|------------------------------------------------------------------------------------------|-------|
| 1  | Key results      | <a href="#">#18</a> | Summarise key results with reference to study objectives                                 | 8- 15 |
| 2  |                  |                     |                                                                                          |       |
| 3  | Limitations      | <a href="#">#19</a> | Discuss limitations of the study, taking into account sources of potential bias or       | 17    |
| 4  |                  |                     | imprecision. Discuss both direction and magnitude of any potential bias.                 |       |
| 5  |                  |                     |                                                                                          |       |
| 6  |                  |                     |                                                                                          |       |
| 7  | Interpretation   | <a href="#">#20</a> | Give a cautious overall interpretation considering objectives, limitations, multiplicity | 15-17 |
| 8  |                  |                     | of analyses, results from similar studies, and other relevant evidence.                  |       |
| 9  |                  |                     |                                                                                          |       |
| 10 |                  |                     |                                                                                          |       |
| 11 | Generalisability | <a href="#">#21</a> | Discuss the generalisability (external validity) of the study results                    | 17    |
| 12 |                  |                     |                                                                                          |       |
| 13 | Funding          | <a href="#">#22</a> | Give the source of funding and the role of the funders for the present study and, if     | 18    |
| 14 |                  |                     | applicable, for the original study on which the present article is based                 |       |
| 15 |                  |                     |                                                                                          |       |

17 The STROBE checklist is distributed under the terms of the Creative Commons Attribution License CC-BY. This checklist can be  
18 completed online using <https://www.goodreports.org/>, a tool made by the [EQUATOR Network](#) in collaboration with [Penelope.ai](#)  
19  
20  
21  
22  
23  
24  
25  
26  
27  
28  
29  
30  
31  
32  
33  
34  
35  
36  
37  
38  
39  
40  
41  
42  
43  
44  
45  
46  
47  
48  
49  
50  
51  
52  
53  
54  
55  
56  
57  
58  
59  
60

# BMJ Open

## Magnitude and determinants of road traffic accidents in Northern Ethiopia: A cross sectional study

|                                 |                                                                                                                                                                                                  |
|---------------------------------|--------------------------------------------------------------------------------------------------------------------------------------------------------------------------------------------------|
| Journal:                        | <i>BMJ Open</i>                                                                                                                                                                                  |
| Manuscript ID                   | bmjopen-2019-034133.R2                                                                                                                                                                           |
| Article Type:                   | Original research                                                                                                                                                                                |
| Date Submitted by the Author:   | 26-Jan-2020                                                                                                                                                                                      |
| Complete List of Authors:       | Woldu, Awtachew; Mekelle University College of Health Sciences Desta, Abraham; Tigray Health Research Institute, Public Health Research Woldearegay , Tewolde ; Tigray Health Research Institute |
| <b>Primary Subject Heading</b>: | Occupational and environmental medicine                                                                                                                                                          |
| Secondary Subject Heading:      | Public health, Health policy                                                                                                                                                                     |
| Keywords:                       | Road Traffic Accident, Drivers, Mekelle city, Tigray, Ethiopia                                                                                                                                   |
|                                 |                                                                                                                                                                                                  |

SCHOLARONE™  
Manuscripts



I, the Submitting Author has the right to grant and does grant on behalf of all authors of the Work (as defined in the below author licence), an exclusive licence and/or a non-exclusive licence for contributions from authors who are: i) UK Crown employees; ii) where BMJ has agreed a CC-BY licence shall apply, and/or iii) in accordance with the terms applicable for US Federal Government officers or employees acting as part of their official duties; on a worldwide, perpetual, irrevocable, royalty-free basis to BMJ Publishing Group Ltd ("BMJ") its licensees and where the relevant Journal is co-owned by BMJ to the co-owners of the Journal, to publish the Work in this journal and any other BMJ products and to exploit all rights, as set out in our [licence](#).

The Submitting Author accepts and understands that any supply made under these terms is made by BMJ to the Submitting Author unless you are acting as an employee on behalf of your employer or a postgraduate student of an affiliated institution which is paying any applicable article publishing charge ("APC") for Open Access articles. Where the Submitting Author wishes to make the Work available on an Open Access basis (and intends to pay the relevant APC), the terms of reuse of such Open Access shall be governed by a Creative Commons licence – details of these licences and which [Creative Commons](#) licence will apply to this Work are set out in our licence referred to above.

Other than as permitted in any relevant BMJ Author's Self Archiving Policies, I confirm this Work has not been accepted for publication elsewhere, is not being considered for publication elsewhere and does not duplicate material already published. I confirm all authors consent to publication of this Work and authorise the granting of this licence.

# Magnitude and determinants of road traffic accidents in Northern Ethiopia: A cross sectional study

Awtachew Berhe Woldu [MSc.]<sup>1</sup>, Abraham Aregay Desta [MSc.]<sup>2\*</sup>, Tewolde Wubayehu  
Woldearegay [MD, MSc.]<sup>2</sup>

<sup>1</sup> Department of Biostatistics, School of Public Health, Mekelle University, Mekelle, Tigray  
Region, Ethiopia, e-mail: [awtachewb@gmail.com](mailto:awtachewb@gmail.com), Cell phone: +251925450934

<sup>2</sup> Department of Public Health Research, Public Health Research and Emergency Management  
Directorate, Tigray Health Research Institute, Mekelle, Tigray Region, Ethiopia, e-mail:  
[abaregaydesta@gmail.com](mailto:abaregaydesta@gmail.com), cell phone: +251923454554, P. O. Box: 1547

<sup>2</sup> Tigray Health Research Institute, Mekelle, Tigray Region, Ethiopia, e-mail:  
[tewuba@yahoo.com](mailto:tewuba@yahoo.com), cell phone: +251907363636, P. O. Box: 1547

\*Corresponding author: Abraham Aregay Desta (AD)



## 24 **Abstract**

25 **Objective:** This study aimed to assess the magnitude and determinants of Road Traffic Accidents  
26 in Mekelle City, Northern Ethiopia.

27 **Methods:** A cross-sectional study was done using a simple random sampling technique.

28 **Setting:** The study was done in Mekelle city from Feb to Jun 2015.

29 **Participants:** The study was done among drivers settled in Mekelle city.

30 **Main outcome measures:** The main outcome measure was occurrence of Road Traffic Accident  
31 within two years. A binary logistic regression was used to identify factors associated with RTA.

32 **Results:** The magnitude of RTA was found to be 23.17%. According to the drivers' perceived  
33 cause of the accident, 22 (38.60%) of the accident was due to violation of traffic rules and  
34 regulations. The majority of the victims were pedestrians, 19 (33.33%). Drivers who were driving  
35 a governmental vehicle were 4.16 (AOR=4.16; 95% CI: 1.48- 11.70) times more likely to have  
36 RTA compared to those who drive private vehicles. Drivers who used alcohol were 2.29  
37 (AOR=2.29; 95% CI: 1.08-4.85) times more likely to have RTA compared to those drivers who  
38 did not consume alcohol.

39 **Conclusion:** Magnitude of reported Road Traffic Accident was high. Violation of traffic laws,  
40 lack of vehicle maintenance and lack of general safety awareness on pedestrians were the dominant  
41 reported causes of RTAs. Driving a governmental vehicle and alcohol consumption were the  
42 factors associated with RTA. Monitoring blood alcohol level of drivers and regular awareness to  
43 the drivers should be in place. Holistic study should be done to identify the causes of RTAs.

44 **Keywords:** Road Traffic Accident; Drivers; Mekelle city; Tigray; Ethiopia

## Strength and Limitation

- Data quality was assured under close supervision of the principal investigators.
- Appropriate statistical methods were used to present the findings of the study.
- Cross sectional study design does not allow establishing causality.
- The analysis of this study misses some important variables like quality of the vehicles and road safety.
- There may be recall bias on the Road Traffic Accidents (RTAs) occurrences.

## 1. Introduction

Road Traffic Accident (RTA) is an accident which occurs or originates on a way or street open to public traffic; resulting in one or more persons being killed or injured, and at least one moving vehicle is involved. RTA includes collisions between vehicles, vehicles and pedestrians and vehicles and animals or fixed obstacles [1]. RTA contributes to poverty by causing loss of productivity, material damage, injuries, disabilities, grief and deaths [2]. Deaths and injuries resulting from road traffic crashes remain a serious problem globally and current trends suggest that this will continue to be the case in the foreseeable future [3, 4]. Road Traffic Accidents is the major cause of economic loss globally. The total costs to public services identified as follows: Older drivers, £63 million. (£10,000 per fatality); People driving for work, £702 million (£700,000 per fatality); Motorcyclists, £1.1 billion (£800,000 per fatality) and young drivers, £1.3 billion (£1.1 Million per fatality) [5].

Approximately 1.3 million people die each year in traffic-related accidents worldwide [6]. Road traffic injury is now the leading cause of death for children and young adults aged 5–29 years, signaling a need for a shift in the current child health agenda. It is the eighth leading cause of death

1  
2  
3 67 for all age groups exceeding HIV/AIDS, tuberculosis and diarrheal diseases [7] and the deaths due  
4  
5 68 to RTAs are predicted to become the 5th leading cause of death by the year 2020 [6].  
6  
7

8  
9 69 The burden of road traffic injuries and deaths is disproportionately borne by vulnerable road users  
10  
11 70 and those living in low- and middle-income countries, where the growing number of deaths is  
12  
13 71 fuelled by transport that is increasingly motorized. Between 2013 and 2016, no reductions in the  
14  
15 72 number of road traffic deaths were observed in any low-income country [2]. Although road  
16  
17 73 infrastructures have a significant role in the occurrence of RTA, the human factor is the most  
18  
19 74 prevalent contributing factor of RTAs. This includes both driving behavior (e.g., drinking and  
20  
21 75 driving, speeding, traffic law violations) and impaired skills (e.g. lack of attention, exhaustion,  
22  
23 76 physical disabilities and so on) [8].  
24  
25  
26  
27

28 77 Poor conditions of quality of vehicles and less road safety are determinant factors for RTA in  
29  
30 78 Africa [9] including Ethiopia [10]. World Health Organization (WHO) in 2011 reported that RTA  
31  
32 79 in Ethiopia reached 22,786 which accounted for 2.77% of all the deaths. The report showed that  
33  
34 80 RTA is the 9<sup>th</sup> killer health problem in the country. Road traffic accident makes Ethiopia 12<sup>th</sup> and  
35  
36 81 9<sup>th</sup> in the world and in Africa respectively [11]. Mekelle is a fast growing regional city, which has  
37  
38 82 a heavy traffic flow, especially during peak hours [12]. In Mekelle city, it was reported that road  
39  
40 83 traffic accidents is increasing from year to year and it was shown that 96% of the causes were  
41  
42 84 related to human risky behavior whereas 4% was due to vehicle related factors [12, 13]. However,  
43  
44 85 despite the growing magnitude of RTAs in the city, there is paucity of data on determinants of  
45  
46 86 RTAs among drivers. In addition, to that the study can have significant role to fill the lack of data  
47  
48 87 as there is lack of reliable data although it is a serious problem in most of the developing countries  
49  
50 88 [14]. Hence, this study was conducted to assess the magnitude and determinants of RTAs among  
51  
52 89 drivers in Mekelle city, Tigray, Ethiopia. This study can have a significant role in supplementing  
53  
54  
55  
56  
57  
58  
59  
60

1  
2  
3 90 and informing the current status in achieving the United Nations (UN) SDG 3.6 for a reduction in  
4  
5 91 the number of deaths by half by 2020 [15].  
6  
7  
8  
9

## 10 92 **2. Methods**

### 13 93 **Study setting**

16 94 The study was conducted among drivers in Mekelle city, Tigray, northern Ethiopia from Feb to  
17  
18 95 Jun 2015. Mekelle is the capital city of the Tigray regional state which is found at 783 Km north  
19  
20 96 of the capital city of Ethiopia, Addis Ababa. Regarding road infrastructure: Mekelle city has 55  
21  
22 97 km asphalted, 23 km cobble stone and 152 km gravel road [16].  
23  
24

### 25 98 **Study design**

28 99 A cross-sectional study design was used.  
29

### 30 100 **Participants**

33 101 All drivers who were based in Mekelle city with a legal driving license and who were driving taxi,  
34  
35 102 Bajaj (three wheel taxi), private owned car and governmental car in Mekelle city were included in  
36  
37 103 the study. Heavy truck drivers, drivers who were not working and sick during the study period,  
38  
39 104 those who drive more than two vehicle types and those who came from other areas to Mekelle city  
40  
41 105 were excluded from the study.  
42  
43

44 106 The sample size was calculated from a previous study, where the prevalence of road traffic accident  
45  
46 107 was reported,  $p=22\%$  in Mekelle city [12]. Using 5% marginal error and 95% confidence interval  
47  
48 108 by the following formula:  
49

$$50$$
$$51 109 n = (Z\alpha/2)^2 P (P-1)/D^2$$
$$52$$

53 110 Where  $n$  = Minimum sample size required

56 111  $Z$  = Standard score corresponding to 95% confidence interval

1  
2  
3 112 P = Assumed proportion of drivers

4  
5 113 D = Margin of error (precision) 5%

6  
7  
8 114  $n = 3.84 \times 0.1716 / 0.0025 = 263$

9  
10 115 Since the source population was less than 10,000(i.e. 1500), sample size correction formula was  
11 used:

12  
13  
14 117  $nf = n / 1 + (n/N)$

15  
16 118 Where nf= desired sample size

17  
18 119 n=calculated sample size

19  
20 120 N=total population

21  
22 121  $nf = n / 1 + (n/N) = 263 / 1 + (263 / 1500) = 263 / 1.175 = 223.8 \sim 224$

23  
24 122 By adding 10% contingency for non-response, the sample size was  $224 + 22 = 246$

## 25 26 27 28 123 **Sampling procedures**

29  
30  
31 124 A sampling frame was constructed by a vehicle plate number, which was obtained from Mekelle  
32 city transport office. The frame was sub categorized based on the type of the vehicle as a taxi,  
33  
34 125 Bajaj, governmental vehicles, and private/house vehicles. Sub samples were calculated for each  
35  
36 126 category of vehicles proportional to the number of vehicles in the respective categories. Then,  
37  
38 127 study subjects were selected using simple random sampling method (see Figure 1).  
39  
40  
41  
42

## 43 44 129 **Data collection procedures and tools**

45  
46 130 The study subjects (drivers) were traced and interviewed for data collection. The drivers were  
47  
48 131 traced at their destination for taxi and Bajaj, house cars in their working area and governmental  
49  
50 132 cars at their offices using the car plate number. A structured interviewer administered  
51  
52 133 questionnaire, adapted from different literatures, was used. The questionnaire was initially  
53  
54 134 prepared in English and was translated into the local language Tigrigna. The instrument included:

1  
2  
3 135 socio-demographic characteristics of drivers, risky behaviors factors and other variables which has  
4  
5 136 a bearing on RTA. Trained data collectors and supervisors handled the data collection process.  
6  
7  
8

### 9 137 **Patient and Public Involvement**

10  
11 138 Drivers in Mekelle city were involved in the study.  
12  
13

### 14 139 **Data Quality Control**

15  
16  
17 140 Pre-test was done on 5% of the sample at Adigrat town, Tigray region. Based on the pretest  
18  
19 141 findings, necessary corrections were made to the questionnaire. Adequate supervision was  
20  
21 142 undertaken by the supervisors and principal investigator during the data collection. Daily spot-  
22  
23 143 checking of the filled questionnaires for errors or any incompleteness was done by the supervisors  
24  
25 144 and the principal investigator.  
26  
27  
28

### 29 145 **Data management and analysis**

30  
31 146 The collected data were entered and cleaned in Microsoft excel 2007. Then, the data were exported  
32  
33 147 and analyzed using STATA version 12. Values of categorical variables were presented as  
34  
35 148 frequencies and percentages. All statistical tests were performed at the 5% significance level.  
36  
37  
38

39 149 The dependent variable was a occurrence Road Traffic Accident (RTA) within two years which  
40  
41 150 was dichotomized into Yes (labeled “1”) and No (labeled “0”). To prevent recall bias respondents  
42  
43 151 were reinforced to remember the occurrence of RTA in the previous two years. Each independent  
44  
45 152 variable was cross tabulated and further evaluated for association in the bivariate binary logistic  
46  
47 153 regression. Finally, variables significant in the bivariate analysis were entered into multivariable  
48  
49 154 binary logistic regression analysis to identify determinants of RTA. Variables on risky behaviors,  
50  
51 155 traffic safety rules and some other personal characteristics were used to interpret the Adjusted  
52  
53  
54  
55  
56  
57  
58  
59  
60

1  
2  
3 156 Odds Ratio (AOR) in the multivariate analysis under the adjustment of the socio demographic  
4  
5 157 variables. The final model was developed using a step-wise logistic regression.  
6  
7  
8 158 The confounding effect of the explanatory variables was checked using forward and backward  
9  
10 159 elimination techniques and any variable above 20% change of coefficient was considered as a  
11  
12 160 confounder. Multi-collinearity was checked using Variance Inflation Factor (VIF) at a cutoff value  
13  
14 161 of 10. Variables with greater than 10 VIF value were handled by removing the most inter-  
15  
16 162 correlated variable(s) from the model and substitute their cross product as an interaction term.  
17  
18 163 Final model fitness was checked using the Hosmer-Lemshew method. Receiver Operating  
19  
20 164 Characteristic (ROC) curve was used to show how much the independent variables in the final  
21  
22 165 model predicted the dependent variable.  
23  
24  
25  
26  
27  
28

### 29 166 **3. Results**

#### 30 167 **Socio-demographic characteristics of the respondents**

31  
32 168 The response rate was 100%. The median (IQR) age of the respondents was 30 (10) years. The  
33  
34 169 majority of study participants (98.37%) were males. Regarding the marital status of the  
35  
36 170 respondents, 102 (41.46%), 101(41.06%), 30 (12.20%) and 13 (5.28%) were divorced, married,  
37  
38 171 single and widower respectively. The majority of the drivers, 170 (69.11%) were Christian  
39  
40 172 Orthodox, followed by Muslims, 54 (21.95%). With regard to their educational status, 225  
41  
42 173 (91.46%) had attained at least grade 5. The median (IQR) monthly income (in Birr) of the study  
43  
44 174 participants was 1000 (1200) (Table 1).  
45  
46  
47  
48  
49  
50

51 175

52 176

53 177

178  
179  
180 Table 1: Socio-demographic and economic characteristics of drivers in Mekelle city, Northern  
181 Ethiopia, 2015. (n=246)

| Variable               | Category               | RTA occurrence/s          |                            | P-value | Total n (%)/<br>median (IQR) |
|------------------------|------------------------|---------------------------|----------------------------|---------|------------------------------|
|                        |                        | No n (%)/<br>median (IQR) | Yes n (%)/<br>median (IQR) |         |                              |
| Age in years           | median (IQR)           | 29 (26, 34)               | 35 (28, 41)                | —       | 30 (26, 36)                  |
| Monthly income in Birr | median (IQR)           | 1000 (700, 1800)          | 1500 (1000, 2300)          | —       | 1000 (800, 2000)             |
| Sex                    | Male                   | 186 (98.41)               | 56 (98.25)                 | 0.93    | 242 (98.37)                  |
|                        | Female                 | 3 (1.59)                  | 1 (1.75)                   |         | 4 (1.63)                     |
| Marital status         | Married                | 74 (39.15)                | 27 (47.37)                 | 0.004   | 101 (41.06)                  |
|                        | Single                 | 88 (46.56)                | 14 (24.56)                 |         | 102 (41.46)                  |
|                        | Divorced               | 21 (11.11)                | 9 (15.79)                  |         | 30 (12.20)                   |
|                        | Widowed                | 6 (3.17)                  | 7 (12.28)                  |         | 13 (5.28)                    |
| Religion               | Orthodox               | 139 (73.54)               | 31 (54.39)                 | 0.031   | 170 (69.11)                  |
|                        | Muslim                 | 37 (19.58)                | (17) 29.82                 |         | (54) 21.95                   |
|                        | Protestant             | 4 (2.12)                  | 4 (7.02)                   |         | 8 (3.25)                     |
|                        | Catholic               | 9 (4.76)                  | 5 (8.77)                   |         | 14 (5.69)                    |
| Educational status     | Illiterate             | 13 (6.88)                 | 4 (7.02)                   | 0.644   | 17 (6.91)                    |
|                        | Primary (Grade 1-4)    | 2 (1.06)                  | 2 (3.51)                   |         | 4 (1.63)                     |
|                        | Secondary (Grade 5-10) | 94 (49.74)                | 27 (47.37)                 |         | 121 (49.19)                  |
|                        | Above 10               | 80 (42.33)                | 24 (42.11)                 |         | 104 (42.28)                  |
| Ethnicity              | Tigray                 | 178 (94.18)               | 44 (77.19)                 | 0.000   | 222 (90.24)                  |
|                        | Amhara                 | 10 (5.29)                 | 7 (12.28)                  |         | 17 (6.91)                    |
|                        | Afar                   | 1 (0.53)                  | 6 (10.53)                  |         | 7 (2.85)                     |

182 Abbreviations: IQR; Inter Quartile Range, P-value; Precision Value



### 183 **Magnitude of RTAs**

184 Among all the drivers, 57 (23.17%) had encountered road traffic accident in the past two years  
 185 from the time of the current study. Most of the accidents happened on Monday, 22 (38.60%) and  
 186 Friday, 13 (22.81%) even though accidents were reported in all the seven days. About 22/57  
 187 (38.60%), 13/57 (22.81%), 10/57 (17.54%) and 9/57 (15.79%) of the reported causes of RTAs  
 188 were due to violation of traffic laws, lack of vehicle maintenance, lack of general safety awareness  
 189 on pedestrians and Violation of speed limit . A significant number of the accidents, 25/57 (43.86%)  
 190 happened at dawn. Pedestrians and Cyclists constituted the major share of the RTA victims, 31/57  
 191 (54.40%). About three fourth of the accidents, 43/57 (75.44%) happened at either T-junction road  
 192 or cross road (Table 2).

193 Table 2: Characteristics and Setting of RTA in Mekelle City, Northern Ethiopia. 2015. (n=246)

| Variables                                   | Category                   | Frequency | Percentage |
|---------------------------------------------|----------------------------|-----------|------------|
| Accident experience in the previous 2 years | Yes                        | 57        | 23.17      |
|                                             | No                         | 189       | 76.83      |
| Type of accident                            | Injury                     | 29        | 50.88      |
|                                             | Injury and Property damage | 14        | 24.56      |
|                                             | Property damage            | 8         | 14.0       |
|                                             | Death                      | 6         | 10.5       |
| Light Condition                             | At dawn                    | 41        | 71.93      |
|                                             | Day time                   | 16        | 28.07      |
| Victim                                      | Pedestrian                 | 19        | 32.14      |
|                                             | Cyclist                    | 12        | 21.43      |
|                                             | Passenger                  | 14        | 25.00      |
|                                             | Driver                     | 12        | 21.43      |
| Accident site road                          | T-junction                 | 15        | 26.32      |
|                                             | Cross Road                 | 28        | 49.12      |

|                                            |                                                 |    |       |
|--------------------------------------------|-------------------------------------------------|----|-------|
|                                            | Straight road                                   | 14 | 24.56 |
| Day of accident                            | Monday                                          | 22 | 38.60 |
|                                            | Tuesday                                         | 4  | 7.02  |
|                                            | Wednesday                                       | 6  | 10.53 |
|                                            | Thursday                                        | 3  | 5.26  |
|                                            | Friday                                          | 13 | 22.81 |
|                                            | Saturday                                        | 9  | 15.79 |
| Number of accidents (life time experience) | 1                                               | 42 | 73.68 |
|                                            | 2                                               | 12 | 21.05 |
|                                            | 3                                               | 3  | 5.26  |
| Reason for the accident                    | Lack of general safety awareness of pedestrians | 10 | 17.54 |
|                                            | Violation of traffic rules and regulations      | 22 | 38.60 |
|                                            | Violation of speed limit                        | 9  | 15.79 |
|                                            | Lack of vehicle maintenance                     | 13 | 22.81 |
|                                            | Did not remember                                | 3  | 5.26  |

194

### 195 **Risky driving behaviors, infrastructure setup and practices**

196 Concerning risky driving behaviors, 92 (37.40) of the drivers drunk alcohol before driving. About  
 197 43 (17.48%) of the drivers were chat chewers and 30 (12.20%) were smokers. More than one third  
 198 of the drivers, 96 (39.02%) ever reported that they used cell phone for communication while  
 199 driving. The prevalence of RTA among drivers was 3.29%, 32.6%, 36.7%, 18.5% and 21.6%  
 200 among cell phone users, alcohol consumers, chat chewers, cigarette smokers and seat belt users  
 201 while driving respectively. However, the prevalence of RTA among the drivers who do not use  
 202 cell phone and seat belt were 17.33% and 30.9% respectively (Table 3).

203 Table 3: Risky driving behaviors, infrastructure setup and practices among drivers in Mekelle city,  
 204 Northern Ethiopia, 2015. (n=246)

| Variables                                                               | Category                  | RTA          |             | Total (%)   | P-Value |
|-------------------------------------------------------------------------|---------------------------|--------------|-------------|-------------|---------|
|                                                                         |                           | Yes<br>n (%) | No<br>n (%) |             |         |
| Cell phone use while driving                                            | Yes                       | 31(32.29)    | 65(67.71)   | 96 (39.02)  | 0.007   |
|                                                                         | No                        | 26(17.33)    | 124(82.67)  | 150 (60.98) |         |
| Substance use                                                           | Alcohol                   | 14(32.6)     | 29(67.4)    | 92 (37.40)  | 0.026   |
|                                                                         | Chat                      | 11(36.7)     | 19(63.3)    | 43 (17.48)  |         |
|                                                                         | Cigarette                 | 32(18.5)     | 141(81.5)   | 30 (12.20)  |         |
| Seat belt use                                                           | Yes                       | 44(21.6)     | 160(78.4)   | 204 (82.93) | 0.189   |
|                                                                         | No                        | 13(30.9)     | 29(69.0)    | 42 (17.07)  |         |
| What do you do when another vehicle tries to pass you?                  | I advise him to slow down | 4(12.5)      | 28(87.5)    | 32 (13.01)  | 0.028   |
|                                                                         | I give him priority       | 42(29.2)     | 102(70.8)   | 144 (58.54) |         |
|                                                                         | I speed up                | 11(15.71)    | 59(84.29)   | 70 (28.46)  |         |
| Road infrastructure                                                     | Gravel                    | 5(16.7)      | 25(83.3)    | 30 (12.2)   | 0.117   |
|                                                                         | Asphalt                   | 39(28.1)     | 100(71.9)   | 77 (31.3)   |         |
|                                                                         | Cobble stone              | 13(16.9)     | 64(83.1)    | 139 (56.5)  |         |
| Service provision of the vehicle as per the manufacturer recommendation | No                        | 3 (5.26)     | 6 (3.17)    | 9 (3.66)    | 0.462   |
|                                                                         | Yes                       | 54 (94.74)   | 183 (96.83) | 237 (96.34) |         |
| Visual impairment                                                       | No                        | 180 (95.24)  | 53 (92.980) | 233 (94.72) | 0.505   |
|                                                                         | Yes                       | 9 (4.76)     | 4 (7.02)    | 13 (5.28)   |         |
| No violation rule for the speed limit                                   | No                        | 7 (3.70)     | 5 (8.770)   | 12 (4.880)  | 0.119   |
|                                                                         | Yes                       | 182 (96.30)  | 52 (91.23)  | 234 (95.12) |         |
| Listen radio while driving                                              | No                        | 47 (22.81)   | 13 (24.87)  | 60 (24.39)  | 0.751   |
|                                                                         | Yes                       | 142 (75.13)  | 44 (77.19)  | 186 (75.61) |         |

|                                                                        |                     |             |            |             |       |
|------------------------------------------------------------------------|---------------------|-------------|------------|-------------|-------|
| What did you do in heavy traffic?                                      | Either pass or stay | 1 (0.53)    | 2 (3.51)   | 3 (1.22)    | 0.069 |
|                                                                        | Pass fast           | 10 (5.29)   | 6 (10.53)  | 16 (6.50)   |       |
|                                                                        | Slow speed          | 178 (94.18) | 49 (85.96) | 227 (92.28) |       |
| Ever received a ticket, citation, or warning for any traffic violation | No                  | 113 (59.79) | 27 (47.37) | 140 (56.91) | 0.097 |
|                                                                        | Yes                 | 76 (40.21)  | 30 (52.63) | 106 (43.09) |       |

## 205 **Factors associated with Road Traffic Accidents**

206 In the bivariate analysis age, being married, being single, driving governmental vehicle, alcohol  
 207 use, other substances other than alcohol use, cell phone use during driving, drivers' years of  
 208 experience and vehicle service were significantly associated with RTAs at 95% CI.  
 209 Multivariable binary logistic regression analysis showed that drivers who drove after consuming  
 210 alcohol were 2.29 (AOR=2. 29; 95% CI: 1.08-4.85) times more likely to have RTA compared to  
 211 drivers who did not consume alcohol. Drivers who drove governmental vehicles were  
 212 4.16 (AOR=4. 16; 95% CI: 1.48- 11.70) times more likely to have RTA compared to drivers of  
 213 privately owned vehicles. As the driver's experience increased by one year, the probability of RTA  
 214 decreased by 26% (AOR=0. 74; 95% CI: 0.60-0.90) (Table 4).

222 Table 4: Bivariate and Multivariable regression analysis of RTA with the predictors in Mekelle  
 223 city, Northern Ethiopia, 2015. (n=246)

| Variables                        | Category                     | COR(95% CI)          | AOR(95% CI)         |
|----------------------------------|------------------------------|----------------------|---------------------|
| Age                              |                              | 0.08(0.041, 0.121)*  | 1.05(0.98, 1.12)    |
| Marital status                   | Married                      | 0.85(0.348, 2.086)*  | 1.62(0.60, 4.39)    |
|                                  | Single                       | 0.37 (0.141, 0.972)* | 0.94(0.25, 3.45)    |
|                                  | Divorced                     | 1(Ref.)              | 1(Ref.)             |
|                                  | Widower                      | 2.72(0.711, 10.408)  |                     |
| Religion                         | Protestant                   | 1(Ref.)              | 1(Ref.)             |
|                                  | Orthodox                     | 0.22( 0.052, 0.940)* | 0.24(0.05, 1.26)    |
|                                  | Muslim                       | 0.45( 0.102, 2.059)  |                     |
|                                  | Catholic                     | 0.55( 0.095, 3.245)  |                     |
| Ethnicity                        | Afar                         | 1(Ref.)              | 1(Ref.)             |
|                                  | Amhara                       | 0.12(0.011, 1.195)   |                     |
|                                  | Tigray                       | 0.04( 0.004, 0.351)* | 0.04(0.005, 0.58)*  |
| Vehicle ownership                | Private (Driver is employee) | 1(Ref.)              | 1(Ref.)             |
|                                  | Governmental                 | 3.5( 1.464, 8.168)*  | 4.16( 1.48, 11.70)* |
|                                  | Driver (Driver is the owner) | 2.38( 1.225, 4.660)* | 1.64(0.71, 3.339)   |
| License grade                    | 1 <sup>st</sup>              | 1(Ref.)              |                     |
|                                  | 3 <sup>rd</sup>              | 1.36(0.329, 5.632)   |                     |
|                                  | 4 <sup>th</sup>              | 0.55(0.138, 2.241)   |                     |
|                                  | Special                      | 1.52(0.249, 9.294)   |                     |
| Alcohol use                      | No                           | 1(Ref.)              | 1(Ref.)             |
|                                  | Yes                          | 1.88(1.034, 3.437)*  | 2.29(1.08, 4.85)*   |
| Substance use other than alcohol | Chat                         | 2.12.(1.010, 4.478)* | 2.18(0.78, 6.05)    |
|                                  | Cigarette                    | 2.55(1.105, 5.884)*  | 1.11(0.39, 3.18)    |
|                                  | I do not use                 | 1(Ref.)              | 1(Ref.)             |
| Cell phone use while driving     | No                           | 1(Ref.)              | 1(Ref.)             |
|                                  | Yes                          | 2.27(1.246, 4.150)*  | 1.80(0.86, 3.74)    |
| Use seat belt while driving      | No                           | 1(Ref.)              |                     |
|                                  | Yes                          | 0.61 (0.29, 1.28)    |                     |
| Income                           |                              | 1.00(0.999, 1.000)   |                     |

|                                                                         |                     |                       |                   |
|-------------------------------------------------------------------------|---------------------|-----------------------|-------------------|
| Distance travelled                                                      |                     | 1.00(0.999, 1.005)    |                   |
| Driver's experience                                                     |                     | 0.86 (0. 749, 0.999)* | 0.74(0.60, 0.90)* |
| Number of vehicle service since the date of the vehicle manufactured    |                     | 1.24(1.103, 1.398)*   | 1.18(0.99, 1.40)  |
| Road infrastructure                                                     | Gravel              | 1 (Ref.)              |                   |
|                                                                         | Cobble stone        | 1.02 (0.33, 3.14)     |                   |
|                                                                         | Asphalt             | 1.95 (0.70, 5.46)     |                   |
| Service provision of the vehicle as per the manufacturer recommendation | No                  | 1 (Ref.)              |                   |
|                                                                         | Yes                 | 0.59 (0.14, 2.44)     |                   |
| Visual impairment                                                       | No                  | 1 (Ref.)              |                   |
|                                                                         | Yes                 | 1.51 (0.45, 5.10)     |                   |
| No violation rule for the speed                                         | No                  | 1 (Ref.)              |                   |
|                                                                         | Yes                 | 0.40 (0.12, 1.31)     |                   |
| Listen radio while driving                                              | No                  | 1 (Ref.)              |                   |
|                                                                         | Yes                 | 1.12 (0.56, 2.26)     |                   |
| What did you do in heavy traffic?                                       | Either pass or stay | 1 (Ref.)              |                   |
|                                                                         | Pass fast           | 0.30 (0.02, 4.06)     |                   |
|                                                                         | Slow speed          | 0.14 (0.01, 1.55)     |                   |
| Ever received a ticket, citation, or warning for any traffic violation  | No                  | 1 (Ref.)              |                   |
|                                                                         | Yes                 | 1.65 (0.91, 3.00)     |                   |

224 Note: \* = P-value less than 0.05

225 The residuals were checked for influential outlier observations and the result showed that there  
 226 were no suspicious influential outlier observations. Hosmer and Lemeshow test showed a chi-  
 227 square value of 9.41 (p=0. 3085) which is greater than 0.05. The null hypothesis is not to be  
 228 rejected, which implies that the model estimates adequately to fit the data at an acceptable

1  
2  
3 229 level. The area under ROC curve was 0.7536 (See figure 2). The predicting power of the  
4  
5 230 independent variables for the dependent variable was 75.36%. Therefore, it can be concluded that  
6  
7  
8 231 the model fits the data reasonably well. No confounding factor was found.  
9

## 10 11 232 **4. Discussion**

12  
13  
14  
15 233 The main aim of the study was to assess the magnitude and determinants of road traffic accidents  
16  
17 234 among drivers in Mekelle city, Tigray, Northern Ethiopia. This study showed 23.17% of the  
18  
19  
20 235 drivers have reported having RTA in the previous two years. Ownership of the vehicles, driving  
21  
22 236 after taking alcohol, driver's experience, used cell phone while driving were the determinants for  
23  
24  
25 237 RTAs among the drivers.

26  
27  
28 238 The study revealed that the magnitude of self-reported RTA in Mekelle city was 23.17%. There  
29  
30 239 was a slight increment of accidents in this study compared to the previous study done in Mekelle  
31  
32 240 city, which showed that the prevalence of RTA was 22% [12]. However, it is lower when compared  
33  
34  
35 241 with a similar study conducted in the same city among taxi drivers with 4 wheels, of which 26.4%  
36  
37 242 of them reported RTA encounter within the past 3 years [17]. This variation might be due to the  
38  
39 243 fact that the city is expanding where the population size is increasing. Or it might be due to the  
40  
41  
42 244 differences in the RTAs report period where the current study included reports of RTA in the past  
43  
44 245 2 years from the time of the study. About three fourth (75.44%) of the accidents of this study,  
45  
46 246 happened at either T-junction or cross roads. The findings of this study is higher as compared to  
47  
48 247 recent statistics from USA and India which showed, approximately 55% of the total traffic crashes  
49  
50  
51 248 and 23% of crashes with fatalities in urban areas in the USA occur at intersections and  
52  
53 249 approximately 32% of urban traffic crashes take place at intersections in India. [18]. This  
54  
55 250 difference might be due to infrastructure differences like traffic lights in the intersections of the  
56  
57  
58  
59  
60

1  
2  
3 251 roads. Because traffic signals do help to prevent collisions if obeying for traffic rules by the drivers  
4  
5 252 [19]. In this study about 22/57 (38.60%), 13/57 (22.81%), 10/57 (17.54%) and 9/57 (15.79%) of  
6  
7  
8 253 the reported causes of RTAs were due to violation of traffic laws, lack of vehicle maintenance,  
9  
10 254 lack of general safety awareness on pedestrians and violation of speed limit. This finding is similar  
11  
12 255 with the study on the comparative analysis of literature concerning road safety, which showed that,  
13  
14 256 the causes include: lack of control and enforcement concerning implementation of traffic  
15  
16 257 regulation (primarily driving at excessive speed, driving under the influence of alcohol, and not  
17  
18 258 respecting the rights of other road users (mainly pedestrians and cyclists), lack of appropriate  
19  
20 259 infrastructure and unroadworthy vehicles [20]. This is because, obeying traffic laws are designed  
21  
22 260 to protect the drivers and other people, animals or from destruction of properties around the road  
23  
24 261 and it self the road. In other words by knowing the rules of the road, practicing good driving skills  
25  
26 262 and generally taking care as a road user can help a vital role in preventing a crash.  
27  
28  
29  
30

31 263 This study identified that ownership of the vehicles was found to be predictor of RTA. Road traffic  
32  
33 264 accident was 3.78 times more likely among those who drove governmental vehicles. A study on  
34  
35 265 Arab gulf countries as compared to other countries showed that vehicle ownership levels and safety  
36  
37 266 parameters in both developed and developing countries is presented to highlight the relative  
38  
39 267 seriousness of the road safety situation in different countries. [21]. The possible justification for  
40  
41 268 this to be happen might be due to the fact that governmental drivers might violate the traffic rules  
42  
43 269 and speed up to arrive timely at workplace especially at the peak hours.  
44  
45  
46  
47

48 270 This study revealed that driving after taking alcohol was found to be an aggravating factor for  
49  
50 271 RTA. Drivers who drove after consuming alcohol were 2.29 more likely to have RTA compared  
51  
52 272 to those who don't consume alcohol. This finding is similar to a similar study which showed that  
53  
54 273 individuals who drank alcohol were 3.2 times more likely to encounter RTA [22]. It was also  
55  
56  
57



1  
2  
3 274 supported by the Great Britain department for Transport provisional estimates for 2013 which  
4  
5 275 showed that between 230 and 290 people were killed in accidents in Great Britain where at least  
6  
7  
8 276 one driver was over the drink drive limit [23]. Another study also showed that impairments from  
9  
10 277 alcohol was associated with traffic accident of crashes and deaths [24, 25]. This might be due to  
11  
12 278 the nature of alcohol that has a range of psycho-motor and cognitive effects, including attitude,  
13  
14 279 judgment, vigilance, perception, reaction, and controlling [26]. This can increase accident risk by  
15  
16  
17 280 lowering cognitive processing, coordination, attention, vision and hearing.  
18  
19

20 281 This study has also revealed that as driver's experience increases by one year, the probability of  
21  
22 282 getting RTA decreased by 26 percent. This finding was similar to the finding of a study in 2003  
23  
24 283 which showed that as the drive miles and experience increases, the probability of self-reported  
25  
26  
27 284 crash decreased [27]. This might be due to the anticipation of potentially hazardous traffic  
28  
29 285 situations which require years of practice.  
30  
31

32 286 The likelihood of RTA was 1.8 times higher among drivers who used cell phone while driving  
33  
34 287 compared to these who do not use. This study is consistent with a previously done study in Mekelle  
35  
36  
37 288 city [17]. Other studies have also reported that drivers distracted by mobile devices such as  
38  
39 289 smartphones and/ or other in-vehicle devices are at risk for a serious negative outcomes [28- 30].  
40  
41  
42 290 A similar study indicated that telephone use while driving increases the likelihood of RTA/ crash  
43  
44 291 by a factor of four, while texting by around 23 times [31]. This is because of loss of attention to  
45  
46 292 surroundings while driving.  
47  
48

49 293 The findings of this study showed visual impairment was not found to be a predictor variable for  
50  
51 294 RTA. But a study done in Ibadan town Nigeria showed that drivers who had visual impairment  
52  
53  
54 295 were 1.6 times more likely to encounter RTA [32]. Therefore, this needs further investigation.  
55  
56  
57  
58  
59  
60

1  
2  
3 296 The strength of this study is that data quality was assured under close supervision of the principal  
4  
5 297 investigators during both data entry and data collection time. Appropriate statistical methods were  
6  
7  
8 298 used to present the findings of the study. Despite this strength, the study have certain limitations.  
9  
10 299 Due to cross-sectional study design nature, establishing causality is not possible. In addition to  
11  
12 300 that, there may be recall bias and the analysis of this study misses some important variables like  
13  
14  
15 301 quality of the vehicles and road safety.

## 16 17 302 **5. Conclusion**

18  
19  
20  
21 303 The magnitude of RTA was high. The intersections of the roads were the main cause of RTAs.  
22  
23 304 Violation of traffic laws, lack of vehicle maintenance and lack of general safety awareness on  
24  
25  
26 305 pedestrians were the dominant reported causes of RTAs. Driving a governmental vehicle and  
27  
28 306 alcohol consumption were the factors associated with RTA. Monitoring blood alcohol level of  
29  
30 307 drivers should be in place. Education on traffic laws and regulations should be given to drivers on  
31  
32  
33 308 regular basis. In addition to that a holistic study should be done to identify the causes of RTA. Due  
34  
35 309 to the similarities of the cities in North Ethiopia, this study can represent to other cities in Northern  
36  
37 310 Ethiopia.

## 38 39 40 41 42 311 **6. Disclosure section**

### 43 44 45 312 **Acknowledgments**

46  
47  
48 313 We are glad to extend our gratitude to the data collectors and participants of the study. We would like to  
49  
50 314 extend our gratitude to Mekelle University as well for funding the research.  
51  
52  
53  
54  
55  
56  
57  
58  
59  
60

### 315 **Author contributions**

316 AW conceptualized and designed the study, involved in data analyses, acquisition of data,  
317 tabulating the data, interpretation of data, preparing tables and figures, and critically revising the  
318 manuscript. AD and TW have involved in interpretation of data, supervision, administration,  
319 drafting the initial manuscript, and critically revising the manuscript. AD have primary  
320 responsibility for final content and involved in final review. All authors read and approved the  
321 final manuscript.

### 322 **Disclosure statement**

323 No potential conflict of interest was reported by the authors.

### 324 **Ethics and consent**

325 Ethical clearance and approval was given by Mekelle University, school of public health Ethical  
326 Review Committee with the approval number of ERC 0017/2014. Written consent was taken  
327 from each participant during the interview. All authors read and approved the final manuscript.

### 328 **Data availability**

329 The data set of the study findings are available from the corresponding author upon reasonable  
330 request.

### 331 **Funding**

332 This study was funded by Mekelle University for research and community services.

### 333 **Figures**

334 Figure 1: Sampling Procedure. Schematic presentation of the sampling procedure.

335 Figure 2: ROC curve. Predicting power of the independent variables for the dependent variable.

## 7. References

1. Organization for Economic Cooperation and Development (OECD). Health Statistics 2019 Definitions, Sources and Methods. [Internet]. Paris: OECD; 2019 [cited 2019 Nov 24]. Available from: file:///C:/Users/lenovo/Downloads/HEALTH\_STAT\_11\_Injuries%20in%20road%20traffic%20accidents.pdf
2. World Health Organization (WHO). Global status report on road safety. Geneva: WHO; 2018.
3. WHO. Projections of mortality and causes of death, 2015 and 2030. [Internet]. Geneva: WHO; 2013 [cited 2019 Oct 29]. Available from: <http://www.who.int/healthinfo/>
4. Foreman KJ, Marquez N, Dolgert A, Fukutaki K, Mcgaughey M, Pletcher MA, et al. Forecasting life expectancy , years of life lost , all-cause and cause-specific mortality for 250 causes of death: reference and alternative scenarios 2016–2040 for 195 countries and territories. *Lancet*. 2018; 392:2052–90.
5. Clifford J, THEOBALD C, Atkinson S, Burger C. Evaluating the costs of incidents from the public sector perspective: a road safety policy research paper. 2016.
6. WHO. Global Plan: Decade of Action for Road Safety 2011-2020. Geneva: WHO; 2010
7. WHO. Global Health Expenditure Database [Internet]. Geneva: WHO; 2018 [cited 2019 Nov 15]. Available from: <http://apps.who.int/nha/database>
8. Nabi H, Consoli SM , Chastang JF, Chiron M, Lafont S, Lagarde E. Type A Behavior Pattern, Risky Driving Behaviors, and Serious Road Traffic Accidents: A Prospective Study of the GAZEL Cohort. *American Journal of Epidemiology*. 2005;161(9).

- 1  
2  
3 358 9. Abuhamoud MA, Rahmat RA, Ismail A. Transportation and its Concerns in Africa: A  
4  
5 359 Review [Internet]. *The Social Science*. 2011; 6: 51-63 [cited 2019 Nov 15]. Available from  
6  
7 360 DOI: 10.3923/sscience.2011.51.63.  
8  
9  
10 361 10. WHO. World health rankings. Live longer live better. Geneva: WHO; 2011.  
11  
12 362 11. WHO. World health rankings. Live longer live better. Geneva: WHO; 2013.  
13  
14 363 12. Hassan A, Godesso A, Abebe L, Girma E. Risky driving behaviors for road traffic accident  
15  
16 364 among drivers in Mekele city, Northern Ethiopia. *BMC Research Notes*. 2011; 4:535.  
17  
18 365 13. Mekelle Town Police Commission Office. Report on road traffic accident Mekele.  
19  
20 366 Mekelle: Police commission; 2014.  
21  
22 367 14. Bener A, Abu-Zidan FM, Bensiali AK, Al-Mulla AA, Jadaan KS. Strategy to improve road  
23  
24 368 safety in developing countries. *Saudi medical journal*. 2003;24(6):603-608.  
25  
26 369 15. United Nations. TRANSFORMING OUR WORLD: THE 2030 AGENDA FOR  
27  
28 370 SUSTAINABLE DEVELOPMENT. New York: United Nations; 2015.  
29  
30 371 16. Mekelle City Administration. Free traffic ranks. [Internet]. Mekelle: Mekelle City  
31  
32 372 administration; 2019 [Cited 2019 Nov 13]. Available from:  
33  
34 373 <http://mekelleadministration.gov.et.rankank.com>  
35  
36 374 17. Asefa NG, Ingale L, Shumey A, Yang H. Prevalence and Factors Associated with Road  
37  
38 375 Traffic Crash among Taxi Drivers in Mekelle Town, Northern Ethiopia, 2014: A Cross  
39  
40 376 Sectional Study. *PLoS ONE*. 2015; 10(3): e0118675.  
41  
42 377 18. Khan, M. A., Agarwal, P. K., & Chaki, S. (2017). Strategies for Safety Evaluation of Road  
43  
44 378 Intersection to have Sustainable Development. *Journal of Advanced Research in*  
45  
46 379 *Automotive Technology and Transportation System*, 2(1&2), 65-77.  
47  
48  
49  
50  
51  
52  
53  
54  
55  
56  
57  
58  
59  
60

- 1  
2  
3 380 19. RHYTHM ENGINEERING. 7 Traffic Signal Myths Debunked. [Internet]. [Cited on 21  
4  
5 381 Jan, 2020]. Available from: <https://rhythmtraffic.com/7-traffic-signal-myths-debunked/>  
6  
7  
8 382 20. Goniewicz K, Goniewicz M, Pawłowski W, Fiedor P. Road accident rates: strategies and  
9  
10 383 programmes for improving road traffic safety. *European journal of trauma and emergency*  
11  
12 384 *surgery*. 2016;42(4), 433-438.
- 14 385 21. Bener A, Abu-Zidan FM, Bensiali AK, Al-Mulla AA, Jadaan KS. Strategy to improve road  
16  
17 386 safety in developing countries. *Saudi medical journal*. 2003;24(6), 603-608.
- 19 387 22. Connor J, Norton R, Ameratunga S, Jackson R. The contribution of alcohol to serious car  
20  
21 388 crash injuries. *Epidemiology*. 2004 May; 15(3):337-44.
- 23 389 23. Great Britain Department for Transport. Estimates for reported road traffic accidents  
24  
25 390 involving illegal alcohol levels: 2013 (second provisional) Self-reported drink and drug  
26  
27 391 driving for 2013/14. Statistical release. [Internet]. London: Great Britain Department for  
28  
29 392 Transport; 2015 [Cited 2019 May 13]. Available from:  
30  
31 393 [https://assets.publishing.service.gov.uk/government/uploads/system/uploads/attachment\\_](https://assets.publishing.service.gov.uk/government/uploads/system/uploads/attachment_data/file/402698/rrcgb-drink-drive-2013-prov.pdf)  
32  
33 394 [data/file/402698/rrcgb-drink-drive-2013-prov.pdf](https://assets.publishing.service.gov.uk/government/uploads/system/uploads/attachment_data/file/402698/rrcgb-drink-drive-2013-prov.pdf)
- 35 395 24. Shinar D. *Traffic Safety and Human Behavior*. 2nd edition. Ben Gurion University of the  
36  
37 396 Negev: Beersheba, Israel; 2017.
- 39 397 25. Brown T, Milavetz G, Murry DJ. Alcohol, drugs and driving: implications for evaluating  
40  
41 398 driver impairment. *Ann Adv Automot Med Assoc Adv Automot Med*. 2013;57:23–32.
- 43 399 26. Zhao X, Zhang X, Rong J. Study of the Effects of Alcohol on Drivers and Driving  
44  
45 400 Performance on Straight Road. [Internet]. Hindawi Publishing Corporation *Mathematical*  
46  
47 401 *Problems in Engineering*. 2014; Article ID 607652, 9 pages. [Cited 2019 Jun 13]. Available  
48  
49 402 from: <http://dx.doi.org/10.1155/2014/607652>  
50  
51  
52  
53  
54  
55  
56  
57  
58  
59  
60

- 1  
2  
3 403 27. Rolison JJ, Regev S, Moutari S, Feeney A. What are the factors that contribute to road  
4  
5 404 accidents? An assessment of law enforcement views, ordinary drivers' opinions, and road  
6  
7 405 accident records. *Accident Analysis & Prevention*. 2018;115: 11-24  
8  
9  
10 406 28. Lipovac K, Đerić M, Tešić M, Andrić Z, Marić B. Mobile phone use while driving literary  
11  
12 407 review. *Transp Res Part F Traffic Psychol Behav*. 2017;47:132–42.  
13  
14  
15 408 29. Caird JK, Willness CR, Steel P, Scialfa C. A meta-analysis of the effects of cell phones on  
16  
17 409 driver performance. *Accid Anal Prev*. 2008;40(4):1282–93.  
18  
19 410 30. Horrey WJ, Wickens CD. Examining the impact of cell phone conversations on driving  
20  
21 411 using metaanalytic techniques. *Hum Factors*. 2006;48(1):196–205.  
22  
23  
24 412 31. Farmer CM, Braitman KA, Lund AK. Cell phone use while driving and attributable crash  
25  
26 413 risk. *Traffic Injury Prevention*. 2010 ;11(5):466-70.  
27  
28 414 32. Bekibele CO, Fawole OI, Bamgboye AE, Adekunle LV, Ajav R, Baiyeroju AM. Risk  
29  
30 415 factors for road traffic accidents among drivers of public institutions in Ibadan, Nigeria.  
31  
32  
33 416 *African Journal Health Science*. 2007;14:137-142.  
34  
35  
36  
37  
38  
39  
40  
41  
42  
43  
44  
45  
46  
47  
48  
49  
50  
51  
52  
53  
54  
55  
56  
57  
58  
59  
60

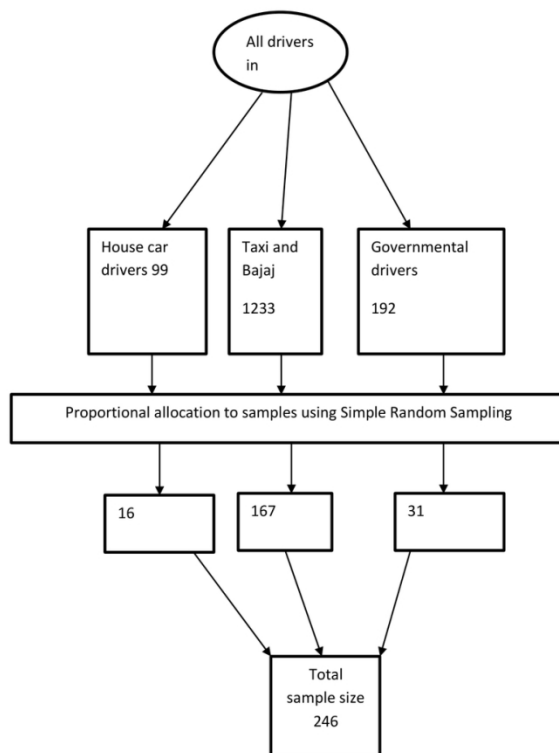

Figure 1: Schematic presentation of the sampling procedure.

107x139mm (300 x 300 DPI)



1  
2  
3  
4  
5  
6  
7  
8  
9  
10  
11  
12  
13  
14  
15  
16  
17  
18  
19  
20  
21  
22  
23  
24  
25  
26  
27  
28  
29  
30  
31  
32  
33  
34  
35  
36  
37  
38  
39  
40  
41  
42  
43  
44  
45  
46  
47  
48  
49  
50  
51  
52  
53  
54  
55  
56  
57  
58  
59  
60

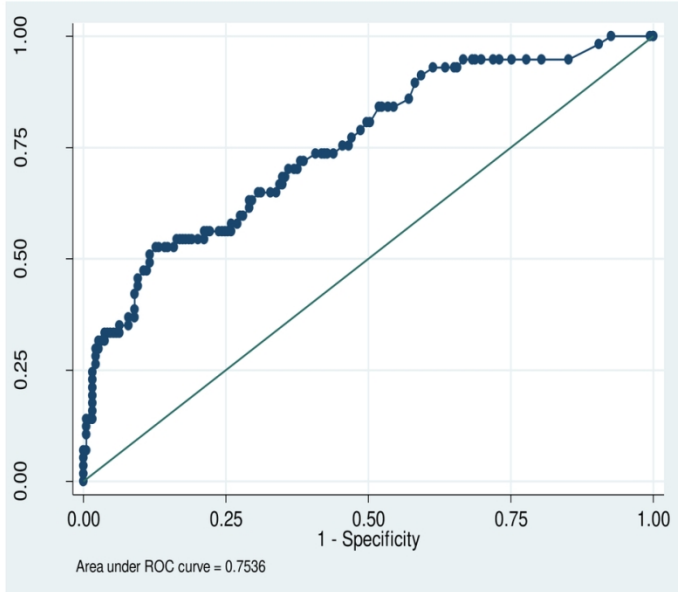

Figure 2: ROC curve, predicting power of the independent variables for the dependent variable.  
107x139mm (300 x 300 DPI)

# Reporting checklist for cross sectional study.

Based on the STROBE cross sectional guidelines.

## Instructions to authors

Complete this checklist by entering the page numbers from your manuscript where readers will find each of the items listed below.

Your article may not currently address all the items on the checklist. Please modify your text to include the missing information. If you are certain that an item does not apply, please write "n/a" and provide a short explanation.

Upload your completed checklist as an extra file when you submit to a journal.

In your methods section, say that you used the STROBE cross sectional reporting guidelines, and cite them as:

von Elm E, Altman DG, Egger M, Pocock SJ, Gøtzsche PC, Vandenbroucke JP. The Strengthening the Reporting of Observational Studies in Epidemiology (STROBE) Statement: guidelines for reporting observational studies.

|                            |                     | Reporting Item                                                                                                                                                                                                                                                       | Page Number |
|----------------------------|---------------------|----------------------------------------------------------------------------------------------------------------------------------------------------------------------------------------------------------------------------------------------------------------------|-------------|
| Title                      | <a href="#">#1a</a> | Indicate the study's design with a commonly used term in the title or the abstract                                                                                                                                                                                   | 1           |
| Abstract                   | <a href="#">#1b</a> | Provide in the abstract an informative and balanced summary of what was done and what was found                                                                                                                                                                      | 2           |
| Background / rationale     | <a href="#">#2</a>  | Explain the scientific background and rationale for the investigation being reported                                                                                                                                                                                 | 4- 5        |
| Objectives                 | <a href="#">#3</a>  | State specific objectives, including any prespecified hypotheses                                                                                                                                                                                                     | 4           |
| Study design               | <a href="#">#4</a>  | Present key elements of study design early in the paper                                                                                                                                                                                                              | 5           |
| Setting                    | <a href="#">#5</a>  | Describe the setting, locations, and relevant dates, including periods of recruitment, exposure, follow-up, and data collection                                                                                                                                      | 5- 6        |
| Eligibility criteria       | <a href="#">#6a</a> | Give the eligibility criteria, and the sources and methods of selection of participants.                                                                                                                                                                             | 5           |
|                            | <a href="#">#7</a>  | Clearly define all outcomes, exposures, predictors, potential confounders, and effect modifiers. Give diagnostic criteria, if applicable                                                                                                                             | 7- 8        |
| Data sources / measurement | <a href="#">#8</a>  | For each variable of interest give sources of data and details of methods of assessment (measurement). Describe comparability of assessment methods if there is more than one group. Give information separately for for exposed and unexposed groups if applicable. | 6           |

|    |                     |                      |                                                                                                                                                                                                                                                                                |                                                        |
|----|---------------------|----------------------|--------------------------------------------------------------------------------------------------------------------------------------------------------------------------------------------------------------------------------------------------------------------------------|--------------------------------------------------------|
| 1  | Bias                | <a href="#">#9</a>   | Describe any efforts to address potential sources of bias                                                                                                                                                                                                                      | 7                                                      |
| 2  |                     |                      |                                                                                                                                                                                                                                                                                |                                                        |
| 3  | Study size          | <a href="#">#10</a>  | Explain how the study size was arrived at                                                                                                                                                                                                                                      | 6                                                      |
| 4  |                     |                      |                                                                                                                                                                                                                                                                                |                                                        |
| 5  | Quantitative        | <a href="#">#11</a>  | Explain how quantitative variables were handled in the analyses. If applicable,                                                                                                                                                                                                | 7- 8                                                   |
| 6  | variables           |                      | describe which groupings were chosen, and why                                                                                                                                                                                                                                  |                                                        |
| 7  |                     |                      |                                                                                                                                                                                                                                                                                |                                                        |
| 8  |                     |                      |                                                                                                                                                                                                                                                                                |                                                        |
| 9  | Statistical methods | <a href="#">#12a</a> | Describe all statistical methods, including those used to control for confounding                                                                                                                                                                                              | 7- 8                                                   |
| 10 |                     |                      |                                                                                                                                                                                                                                                                                |                                                        |
| 11 |                     | <a href="#">#12b</a> | Describe any methods used to examine subgroups and interactions                                                                                                                                                                                                                | 8                                                      |
| 12 |                     |                      |                                                                                                                                                                                                                                                                                |                                                        |
| 13 |                     | <a href="#">#12c</a> | Explain how missing data were addressed                                                                                                                                                                                                                                        | N/A                                                    |
| 14 |                     |                      |                                                                                                                                                                                                                                                                                |                                                        |
| 15 |                     | <a href="#">#12d</a> | If applicable, describe analytical methods taking account of sampling strategy                                                                                                                                                                                                 | N/A                                                    |
| 16 |                     |                      |                                                                                                                                                                                                                                                                                |                                                        |
| 17 |                     | <a href="#">#12e</a> | Describe any sensitivity analyses                                                                                                                                                                                                                                              | N/A                                                    |
| 18 |                     |                      |                                                                                                                                                                                                                                                                                |                                                        |
| 19 | Participants        | <a href="#">#13a</a> | Report numbers of individuals at each stage of study—eg numbers potentially eligible, examined for eligibility, confirmed eligible, included in the study, completing follow-up, and analysed. Give information separately for for exposed and unexposed groups if applicable. | n/a there were no stages and study was not on patients |
| 20 |                     |                      |                                                                                                                                                                                                                                                                                |                                                        |
| 21 |                     | <a href="#">#13b</a> | Give reasons for non-participation at each stage                                                                                                                                                                                                                               | n/a                                                    |
| 22 |                     |                      |                                                                                                                                                                                                                                                                                |                                                        |
| 23 |                     | <a href="#">#13c</a> | Consider use of a flow diagram                                                                                                                                                                                                                                                 | 6                                                      |
| 24 |                     |                      |                                                                                                                                                                                                                                                                                |                                                        |
| 25 | Descriptive data    | <a href="#">#14a</a> | Give characteristics of study participants (eg demographic, clinical, social) and information on exposures and potential confounders. Give information separately for exposed and unexposed groups if applicable.                                                              | 7                                                      |
| 26 |                     |                      |                                                                                                                                                                                                                                                                                |                                                        |
| 27 |                     | <a href="#">#14b</a> | Indicate number of participants with missing data for each variable of interest                                                                                                                                                                                                | N/A                                                    |
| 28 |                     |                      |                                                                                                                                                                                                                                                                                |                                                        |
| 29 | Outcome data        | <a href="#">#15</a>  | Report numbers of outcome events or summary measures. Give information separately for exposed and unexposed groups if applicable.                                                                                                                                              | 7                                                      |
| 30 |                     |                      |                                                                                                                                                                                                                                                                                |                                                        |
| 31 | Main results        | <a href="#">#16a</a> | Give unadjusted estimates and, if applicable, confounder-adjusted estimates and their precision (eg, 95% confidence interval). Make clear which confounders were adjusted for and why they were included                                                                       | 13                                                     |
| 32 |                     |                      |                                                                                                                                                                                                                                                                                |                                                        |
| 33 |                     | <a href="#">#16b</a> | Report category boundaries when continuous variables were categorized                                                                                                                                                                                                          | N/A                                                    |
| 34 |                     |                      |                                                                                                                                                                                                                                                                                |                                                        |
| 35 |                     | <a href="#">#16c</a> | If relevant, consider translating estimates of relative risk into absolute risk for a meaningful time period                                                                                                                                                                   | n/a estimates were for odds ratio                      |
| 36 |                     |                      |                                                                                                                                                                                                                                                                                |                                                        |
| 37 | Other analyses      | <a href="#">#17</a>  | Report other analyses done—e.g., analyses of subgroups and interactions, and sensitivity analyses                                                                                                                                                                              | 15- 16                                                 |
| 38 |                     |                      |                                                                                                                                                                                                                                                                                |                                                        |
| 39 |                     |                      |                                                                                                                                                                                                                                                                                |                                                        |
| 40 |                     |                      |                                                                                                                                                                                                                                                                                |                                                        |
| 41 |                     |                      |                                                                                                                                                                                                                                                                                |                                                        |
| 42 |                     |                      |                                                                                                                                                                                                                                                                                |                                                        |
| 43 |                     |                      |                                                                                                                                                                                                                                                                                |                                                        |
| 44 |                     |                      |                                                                                                                                                                                                                                                                                |                                                        |
| 45 |                     |                      |                                                                                                                                                                                                                                                                                |                                                        |
| 46 |                     |                      |                                                                                                                                                                                                                                                                                |                                                        |
| 47 |                     |                      |                                                                                                                                                                                                                                                                                |                                                        |
| 48 |                     |                      |                                                                                                                                                                                                                                                                                |                                                        |
| 49 |                     |                      |                                                                                                                                                                                                                                                                                |                                                        |
| 50 |                     |                      |                                                                                                                                                                                                                                                                                |                                                        |
| 51 |                     |                      |                                                                                                                                                                                                                                                                                |                                                        |
| 52 |                     |                      |                                                                                                                                                                                                                                                                                |                                                        |
| 53 |                     |                      |                                                                                                                                                                                                                                                                                |                                                        |
| 54 |                     |                      |                                                                                                                                                                                                                                                                                |                                                        |
| 55 |                     |                      |                                                                                                                                                                                                                                                                                |                                                        |
| 56 |                     |                      |                                                                                                                                                                                                                                                                                |                                                        |
| 57 |                     |                      |                                                                                                                                                                                                                                                                                |                                                        |
| 58 |                     |                      |                                                                                                                                                                                                                                                                                |                                                        |
| 59 |                     |                      |                                                                                                                                                                                                                                                                                |                                                        |
| 60 |                     |                      |                                                                                                                                                                                                                                                                                |                                                        |

|    |                  |                     |                                                                                          |       |
|----|------------------|---------------------|------------------------------------------------------------------------------------------|-------|
| 1  | Key results      | <a href="#">#18</a> | Summarise key results with reference to study objectives                                 | 16    |
| 2  |                  |                     |                                                                                          |       |
| 3  | Limitations      | <a href="#">#19</a> | Discuss limitations of the study, taking into account sources of potential bias or       | 19    |
| 4  |                  |                     | imprecision. Discuss both direction and magnitude of any potential bias.                 |       |
| 5  |                  |                     |                                                                                          |       |
| 6  |                  |                     |                                                                                          |       |
| 7  | Interpretation   | <a href="#">#20</a> | Give a cautious overall interpretation considering objectives, limitations, multiplicity | 16-19 |
| 8  |                  |                     | of analyses, results from similar studies, and other relevant evidence.                  |       |
| 9  |                  |                     |                                                                                          |       |
| 10 |                  |                     |                                                                                          |       |
| 11 | Generalisability | <a href="#">#21</a> | Discuss the generalisability (external validity) of the study results                    | 19    |
| 12 |                  |                     |                                                                                          |       |
| 13 | Funding          | <a href="#">#22</a> | Give the source of funding and the role of the funders for the present study and, if     | 20    |
| 14 |                  |                     | applicable, for the original study on which the present article is based                 |       |
| 15 |                  |                     |                                                                                          |       |

The STROBE checklist is distributed under the terms of the Creative Commons Attribution License CC-BY. This checklist can be completed online using <https://www.goodreports.org/>, a tool made by the [EQUATOR Network](#) in collaboration with [Penelope.ai](#)
